1 **Reduced-representation bisulfite sequencing finds epigenome-wide response**  
2 **to oil pollution in the foundation plant *Spartina alterniflora***

3  
4 **Mariano Alvarez\***

5 Department of Biology, Duke University, Durham, NC, 27708, USA;  
6 [marianoferdinandalvarez@gmail.com](mailto:marianoferdinandalvarez@gmail.com)

7  
8 **Marta Robertson\***

9 IRHS-INRA 49071 Beaucouzé Cedex, France; [marta.h.robertson@gmail.com](mailto:marta.h.robertson@gmail.com)

10  
11 **Thomas van Gurp**

12 Department of Terrestrial Ecology, Netherlands Institute of Ecology (NIOO-KNAW), Wageningen, the  
13 Netherlands;

14  
15 **Cornelis A. M. Wagemaker**

16 Department of Experimental Plant Ecology, Radboud University, Nijmegen, the Netherlands;  
17 [n.wagemaker@science.ru.nl](mailto:n.wagemaker@science.ru.nl)

18  
19 **Delphine Giraud**

20 UMR CNRS 6553 ECOBIO, OSUR, Université de Rennes 1, Campus Scientifique de Beaulieu, 35042  
21 Rennes, France; [delphine.giraud@univ-rennes1.fr](mailto:delphine.giraud@univ-rennes1.fr)

22  
23 **Malika L. Ainouche**

24 UMR CNRS 6553 ECOBIO, OSUR, Université de Rennes 1, Campus Scientifique de Beaulieu, 35042  
25 Rennes, France ; [malika.ainouche@univ-rennes1.fr](mailto:malika.ainouche@univ-rennes1.fr)

26  
27 **Armel Salmon**

28 UMR CNRS 6553 ECOBIO, OSUR, Université de Rennes 1, Campus Scientifique de Beaulieu, 35042  
29 Rennes, France; [armel.salmon@univ-rennes1.fr](mailto:armel.salmon@univ-rennes1.fr)

30  
31 **Koen J. F. Verhoeven**

32 Department of Terrestrial Ecology, Netherlands Institute of Ecology (NIOO-KNAW), Wageningen, the  
33 Netherlands; [k.verhoeven@nioo.knaw.nl](mailto:k.verhoeven@nioo.knaw.nl)

34  
35 **Christina L. Richards**

36 Department of Integrative Biology, University of South Florida, Tampa, FL 33620, USA; [clr@usf.edu](mailto:clr@usf.edu)

37  
38 \*indicates equal contribution by authors

39  
40  
41 **Running title:** Epigenetic response to pollution

42 **Keywords:** AFLP, DNA methylation, epiGBS, epigenetics, foundation species, oil pollution, salt marsh,  
43 *Spartina alterniflora*

44 **Type of article:** Letter

45 147 words in abstract, 4989 words in main text

46 80 references, 3 figures and 2 tables; 1 supplemental table, 4 supplemental figures

47  
48 **Correspondence:** Christina L. Richards, Department of Integrative Biology, University of South Florida,  
49 4202 East Fowler Avenue, Tampa, FL 33617, USA; phone: +001 813 974 5090; fax: +001 813 974 3263;  
50 [clr@usf.edu](mailto:clr@usf.edu)

51 **Author Contributions**

52 CLR & KJFV conceived the study. CLR, KJFV, MA, MR, MLA and AS designed the experiments and  
53 analyses. MA, MR, CAMW and TVG did the laboratory work. MA, MR, and TVG analyzed the epiGBS  
54 data. CLR, MA, DG, and AS analyzed the transcriptome and gene expression data. CLR, MA and MR  
55 wrote the first draft of the manuscript. All co-authors provided input and revisions to the manuscript.

56

57 **Data accessibility**

58 Raw data files are available on Dryad at XXX. Processed data and R scripts are available on  
59 [github.com/alvarezmf/DWH\\_epigbs](https://github.com/alvarezmf/DWH_epigbs).

60 **Abstract**

61 The application of genomics technology in ecological contexts allows for examination of how  
62 rapid environmental change may shape standing molecular level variation and organismal  
63 response. We previously demonstrated an effect of oil pollution on gene expression patterns and  
64 genetic variation, but not methylation variation, in oil-exposed populations of the foundation salt  
65 marsh grass, *Spartina alterniflora*. Here, we used a reduced representation bisulfite sequencing  
66 approach, epigenotyping by sequencing (epiGBS), to examine relationships among DNA  
67 sequence, DNA methylation, gene expression, and exposure to oil pollution. With the increased  
68 resolution of epiGBS, we document genetic and methylation differentiation between oil-exposed  
69 and unexposed populations, and a correlation of genome-wide methylation patterns and gene  
70 expression, independent of population genetic structure. Overall, these findings demonstrate that  
71 variation in DNA methylation is abundant, responsive, and correlated to gene expression in  
72 natural populations, and may represent an important component of the response to environmental  
73 stress.

74

## 75 **Introduction**

76       The application of molecular techniques to ecological questions can provide insight into  
77 the mechanisms that govern ecological interactions at the most basic levels of biological  
78 organization. Studies across a diversity of organisms have described the association of genetic  
79 variation with environmental factors (Feder & Mitchell-Olds, 2003; Andrew *et al.*, 2013). More  
80 recently, transcriptomics studies in natural populations have identified gene expression  
81 differences that underlie phenotypic plasticity, genotype-by-environment interactions, and local  
82 adaptation, and that some of these differences are only elicited in natural environments (Nicotra  
83 *et al.*, 2010; Andrew *et al.*, 2013; Alvarez *et al.*, 2015). Hence, genetic variation and gene  
84 expression variation can translate into trait variation that contributes to organismal performance  
85 with important population- and community-level ecological effects (Whitham *et al.*, 2006;  
86 Hughes *et al.*, 2008; Schoener, 2011; Alvarez *et al.*, 2015). Additional layers of regulatory  
87 variation, including chromatin modifications, small RNAs, and other non-coding variants, can  
88 mediate these changes in genotypic expression and phenotype, but are infrequently studied in  
89 ecological settings (Nicotra *et al.*, 2010; Richards *et al.*, 2017).

90       Like genetic variation and gene expression variation, chromatin modifications such as  
91 DNA methylation can also vary among individuals within populations, and contribute to  
92 phenotypic variation through a variety of regulatory roles (Becker & Weigel, 2012; Jackson,  
93 2017; Richards *et al.*, 2017). For example, DNA methylation may affect phenotype and  
94 subsequent ecological interactions by modulating the expression of genes (Alvarez *et al.*, 2015,  
95 2018), the types of transcripts that genes produce (Maor *et al.*, 2015), the movement of mobile  
96 elements (Matzke & Mosher, 2014), and the production of structural variants (Yelina *et al.*,  
97 2015; Underwood *et al.*, 2018). On the other hand, changes in genetic sequence or gene  
98 expression may cause variation in patterns of DNA methylation, creating a relationship that is  
99 bidirectional and heterogeneous across the genome (Secco *et al.*, 2015; Meng *et al.*, 2016;  
100 Niederhuth & Schmitz, 2017). DNA methylation can vary in response to environment, and has  
101 been correlated to habitat types, exposure to stress, and shifts in species range (Verhoeven *et al.*,  
102 2010; Richards *et al.*, 2012a; Liebl *et al.*, 2013; Xie & Li *et al.*, 2015; Foust *et al.*, 2016). While  
103 some studies have provided insight into how the complex interaction between genetic variation,  
104 DNA methylation, and the regulation of gene expression translates into organismal response (e.g  
105 Wibowo *et al.* 2016), these mechanisms are only understood in a few model species, partly

106 because of the limited genomic resources available for most species (Ainouche *et al.*, 2009;  
107 Richards *et al.*, 2017). Increasing application of high-resolution methods to understand genome-  
108 level response to environmental conditions in natural populations is one of the central current  
109 tasks of ecological genomics.

110 In 2010, the *Deepwater Horizon (DWH)* oil spill developed into the largest marine oil  
111 spill in history (National Commission on the BP *Deepwater Horizon* oil spill, 2011), and became  
112 an opportunity to apply emerging genomics technologies in natural populations to examine  
113 responses to this recurrent anthropogenic stress in a diversity of organisms (e.g. Hazen *et al.*  
114 2010; Whitehead *et al.* 2012; Kimes *et al.* 2013, 2014; Alvarez *et al.* 2018; DeLeo *et al.* 2018). A  
115 mixture of crude oil made and dispersants made landfall along 1,773 kilometers on the shorelines  
116 of Louisiana, Mississippi, Alabama and Florida (Mendelssohn *et al.*, 2012; Michel *et al.*, 2013).  
117 Nearly half of the habitat affected was salt marsh, which provides valuable ecosystem functions  
118 such as providing nurseries for birds and fish, and buffering storm and wave action (Day *et al.*,  
119 2007; Mendelssohn *et al.*, 2012; Michel *et al.*, 2013). Gulf of Mexico salt marshes are dominated  
120 by the foundation species *Spartina alterniflora*, which is remarkably resilient to a variety of  
121 environmental stressors (Pennings & Bertness, 2001; Baisakh *et al.*, 2008; Baisakh & Subudhi,  
122 2009; Silliman *et al.*, 2012; Bedre *et al.*, 2016). Crude oil exposure from the *DWH* oil spill  
123 resulted in reduced carbon fixation, reduced transpiration, and extensive above-ground dieback  
124 in *S. alterniflora* populations (Lin & Mendelssohn, 2012; Silliman *et al.*, 2012), but oil-affected  
125 populations showed partial to complete recovery within seven months of the spill (Lin *et al.*,  
126 2016). However, the genomic and regulatory mechanisms that underlie this remarkable recovery  
127 have been poorly characterized.

128 Despite the tremendous resilience of *S. alterniflora* to the *DWH* spill, we discovered  
129 genetic divergence of individuals from oil-exposed areas and nearby uncontaminated areas  
130 (Robertson *et al.*, 2017). We also found that pollution tolerance may be modulated by a diverse  
131 set of candidate genes (Alvarez *et al.*, 2018). In particular, we provided support for the role of an  
132 epigenetic regulator (a homolog of the histone methyltransferase SUVH5), which significantly  
133 altered growth and flower production under crude oil stress in experimental studies (Alvarez *et*  
134 *al.*, 2018). Considering that histone modifications may regulate and be regulated by DNA  
135 methylation (reviewed in Du *et al.*, 2015), we expected to find a strong correlation between  
136 patterns of DNA methylation and crude oil exposure. However, while a few DNA methylation

137 loci (measured via methylation sensitive amplified fragment length polymorphism; MS-AFLP)  
138 were correlated with oil exposure, we did not find genome-wide patterns in DNA methylation  
139 correlated with oil exposure in *S. alterniflora* (Robertson *et al.*, 2017). Our findings supported  
140 genetic differentiation in response to exposure to crude oil, but suggested that our ability to  
141 detect changes in DNA methylation may have been limited by the number of MS-AFLP markers  
142 (39 polymorphic loci). Further, although our previous study identified population-level patterns  
143 of divergence, we were unable to associate the anonymous AFLP loci with gene function  
144 (Schrey *et al.*, 2013).

145         In this study, we used a recently developed reduced representation bisulfite sequencing  
146 technique, epigenotyping by sequencing (epiGBS), to generate a more robust DNA sequence and  
147 DNA methylation data set (van Gurp *et al.*, 2016). We expected that the increased resolution,  
148 both in number and in detail of the markers, provided by this sequencing approach would allow  
149 us to identify fine scale DNA methylation structure that was not apparent in our previous MS-  
150 AFLP study. We further expected that biasing toward coding regions of the genome with the use  
151 of methylation sensitive enzymes in the epiGBS protocol (van Gurp *et al.*, 2016) would allow us  
152 to find evidence that DNA methylation was correlated with changes in gene function since some  
153 fragments might overlap with the promoter or 5' end of the coding regions of genes (Niederhuth  
154 & Bewick *et al.*, 2016). Therefore, we hypothesized that genome-wide expression, as well as  
155 expression of candidate genes, could be correlated to changes in genetic variation and DNA  
156 methylation.

157

## 158 **Materials and Methods**

159

### 160 *Sample Collection*

161         We collected individuals from the leading edge of the marsh at three contaminated and  
162 three uncontaminated sites near Grand Isle, Louisiana and Bay St. Louis, Mississippi in August  
163 2010, four months after the *DWH* oil spill as described in previous studies (Table 1; Robertson *et al.*  
164 *et al.*, 2017; Alvarez *et al.*, 2018). These sites were naturally highly variable in conditions, but all  
165 sites supported monocultures of *S. alterniflora*. Contaminated sites were identified by the visual  
166 presence of oil on the sediment, and substantial above-ground dieback of *S. alterniflora* on the  
167 leading edge of the marsh with *S. alterniflora* plants growing up through the dead wrack. Nearby

168 uncontaminated sites did not have any visual signs of the presence of oil or noticeable dieback of  
169 the above ground portions of *S. alterniflora* (contamination status confirmed via NRDA  
170 databases, Robertson *et al.*, 2017). To standardize age and minimize developmental bias in  
171 sampling, we collected the third fully expanded leaf from each of eight individuals, spaced 10  
172 meters apart at each of the six sites (N=48). Leaf samples were immediately frozen in liquid  
173 nitrogen to prevent degradation, and kept frozen during transport to the University of South  
174 Florida for processing and analysis.

175

#### 176 *DNA extractions and library prep*

177 We isolated DNA from each sample (48) using the Qiagen DNeasy plant mini kit  
178 according to the manufacturer's protocol. We prepared epiGBS libraries *sensu* van Gurp *et al.*  
179 (2016). Briefly, isolated DNA was fragmented with the enzyme PstI, which is sensitive to CHG  
180 methylation and biases resulting libraries toward coding regions (van Gurp *et al.*, 2016). After  
181 digestion, adapters with variable barcodes were ligated to either end of the resulting fragments.  
182 Adapters contained methylated cytosines to ensure their sequence fidelity through the subsequent  
183 bisulfite treatment. We used the Zymo EZ Lightning methylation kit to bisulfite treat and clean  
184 the DNA. Libraries were then amplified with the KAPA Uracil Hotstart Ready Mix with the  
185 following PCR conditions: an initial denaturation step at 98°C for 1 min followed by 16 cycles of  
186 98°C for 15s, 60°C for 30s, and 72°C for 30s, with a final extension of 72°C for 5 min. Paired-  
187 end reads were sequenced at the University of Florida Interdisciplinary Center for Biotechnology  
188 Research on the Illumina HiSeq 5000.

189

#### 190 *Data pre-processing and mapping to transcriptome*

191 We used the epiGBS pipeline (van Gurp *et al.*, 2016) to demultiplex samples, trim  
192 adapter sequences, and assemble the *de novo* reference sequence  
193 (<https://github.com/thomasvangurp/epiGBS>). To improve variant calling while accounting for  
194 polyploidy, we realigned individuals to the *de novo* reference (generated from the epiGBS  
195 pipeline), separately using BWA-meth (Pedersen *et al.*, 2014), and called variants using the  
196 GATK pipeline (DePristo *et al.*, 2011) with a specified ploidy of six. Methylation was tabulated  
197 using the existing epiGBS analysis pipeline. Both SNP and methylation data were filtered  
198 separately to include only loci that were present in more than 90% of individuals, with no more

199 than 50% missing from any one individual. Thus, each locus had, at most, 10% missing data,  
200 while each individual had less than 50% missing data across all loci. We removed loci with less  
201 than 5x depth of coverage and remaining missing data were imputed via a k-nearest neighbors  
202 approach, yielding a matrix of “common loci” (impute, Hastie *et al.*, 2018).

203 All fragments were mapped to the published *S. alterniflora* transcriptome (Boutte *et al.*,  
204 2016) and the *Oryza sativa* genome (Michigan State University version 7, Kawahara *et al.*, 2013)  
205 using BLAST (Altschul *et al.*, 1997). We estimated the number and order of exons by mapping  
206 the *S. alterniflora* transcriptome to *Oryza sativa*. We also tested for random sampling across  
207 exons among the epiGBS fragments that occurred within coding regions using a Kolmogorov-  
208 Smirnov test. We used BLAST (Altschul *et al.*, 1997) and RepeatExplorer (Novak *et al.*, 2013)  
209 to compare our sequenced fragments to the *S. alterniflora* transcriptome (Ferreira de Carvalho *et*  
210 *al.*, 2013, 2017; Boutte *et al.*, 2016) and known repeat elements, respectively.

211

## 212 *Population genetics*

213 Our RRBS did not provide sufficient sequencing depth to estimate hexaploid genotype  
214 likelihoods with confidence, particularly considering the high levels of heterozygosity measured  
215 in *S. alterniflora* populations (Richards *et al.*, 2004; Travis & Hester, 2005) and the lack of a  
216 high-quality reference genome (Dufresne *et al.*, 2014; Boutte *et al.*, 2016). We therefore used the  
217 frequency of the most common allele within an individual at each polymorphic locus to estimate  
218 allelic diversity, and to estimate Nei’s genetic distances among individuals and sites (StAMPP,  
219 Pembleton *et al.*, 2013).

220 We obtained pairwise  $F_{ST}$  values between populations to test for significance of pairwise  
221 differences. Following recommendations from Meirmans (2015) to minimize false positives, we  
222 used distance-based redundancy analysis (RDA; Vegan, Oksanen *et al.* 2017) to assess isolation  
223 by distance by regressing the genetic relatedness matrix against latitude and longitude (genetic  
224 distance ~ latitude \* longitude) for each site using constrained analysis of principal coordinates  
225 (Vegan, Oksanen *et al.*, 2017).

226 To quantify the relationship between genome-wide variation and environmental  
227 conditions, we used RDA with surrogate variables to represent the complex differences among  
228 sites with the formula (genetic distance ~ oil exposure + surrogate variables). Redundancy  
229 analysis allowed us to assess the joint influence of all SNPs simultaneously (Lasky *et al.*, 2015;



230 Forester et al. 2016). Although we attempted to control for variation among samples and sites  
231 with a replicated sampling strategy, rather than using a single term for “site”, we included  
232 parameters identified by surrogate variable analysis (SVA), which provides a method to detect  
233 residual variation due to unmeasured differences among populations including environmental  
234 variation, life history variation, and geographical separation, between samples that may distort  
235 analyses (Leek *et al.*, 2017). We estimated surrogate variables by fitting a full and null model to  
236 the appropriate (i.e. DNA sequence allele frequency or DNA methylation frequency) high  
237 dimensional data matrix and examining the principal components of the residuals (Leek &  
238 Storey, 2007). We used a permutational test (999 permutations) to assess the significance of  
239 differences between the treatment and control groups, given the covariates. We also tested for  
240 differences in the amount of dispersion around centroids (multivariate variance) between oil-  
241 exposed or unexposed populations (PERMDISP2, Vegan, Oksanen *et al.* 2017). We corrected  
242 the resulting P values for false discovery using a Holm correction, and visualized results using  
243 multidimensional scaling (MDS, Vegan, Oksanen *et al.* 2017).

244 To identify SNPs that were significantly correlated with oil contamination, we used  
245 binomial linear mixed modeling (MACAU; Lea *et al.*, 2015) including a genetic relatedness  
246 matrix to account for population structure and the surrogate variables as covariates. All locus-by-  
247 locus association scans were corrected for family-wise false discovery using the Q-value package  
248 in R (Storey *et al.*, 2015).

249

### 250 *Methylation analysis*

251 During the filtering process, loci were annotated with their methylation context, but all  
252 contexts were pooled for distance-based analyses as well as family-wise error rate corrections  
253 after locus-by-locus modeling. We tabulated methylation frequency at each locus, defined as the  
254 fraction of methylated cytosines observed out of the total number of cytosines measured at a  
255 given locus (methylated cytosines/(methylated+unmethylated cytosines)), and used methylation  
256 frequencies to generate a methylation distance matrix in R.

257 To identify signatures of DNA methylation variation that were correlated with oil  
258 exposure and not genetic structure, we used principal components analysis to reduce the genetic  
259 data to orthogonal components, and identified 8 of the 42 possible principal components axes  
260 that were significantly correlated with methylation. We then modeled the impact of oil exposure

261 to genome-wide patterns of DNA methylation by jointly assessing the influence of all  
262 polymorphic methylation loci concurrently via RDA (Vegan, Oksanen *et al.* 2017) with the  
263 formula (methylation distance ~ oil exposure + surrogate variables + significant principal  
264 components of allele frequency data). We corrected the resulting P values for false discovery  
265 using a Holm correction, and visualized results using multidimensional scaling (MDS, Vegan,  
266 Oksanen *et al.* 2017).

267 To identify differentially methylated positions (DMPs) between contaminated and  
268 uncontaminated samples, we used binomial linear mixed modeling (MACAU; Lea *et al.*, 2015),  
269 using the genetic relatedness matrix and surrogate variables as covariates to control for  
270 population structure. We corrected locus-specific P-values for multiple testing (qvalue, Storey *et*  
271 *al.*, 2015), and tested for overrepresentation of cytosine contexts (CG, CHG, CHH) using an  
272 exact binomial test, implemented in R. Because our epiGBS fragments rarely exceeded 200bp,  
273 we did not identify differentially methylated regions.

274

#### 275 *Relationships to gene expression variation*

276 We used transcriptome data from our previous analyses of three mRNA pools of three  
277 individuals from each of the six sites to assess the relationship between variation in gene  
278 expression, genetic variation, and methylation variation (Alvarez *et al.*, 2018). We found 3,334  
279 genes that responded to crude oil exposure in *S. alterniflora* out of 15,950 genes that were  
280 assessed. In order to make the epiGBS data comparable to our pools of mRNA, we concatenated  
281 SNPs and methylation polymorphisms from individuals into *in silico* sample pools by averaging  
282 values at individual loci across samples within pools of the same individuals that were used in  
283 the gene expression analysis. We then calculated genetic, expression, and methylation distances  
284 between sample pools and used multiple regression on distance matrices to assess the  
285 relationship between all three data types (MRM; ecodist, Goslee & Urban, 2007).

286 We assessed the correlation between gene expression, genetic variation, and methylation  
287 variation within the same fragment (i.e. *in cis*) gene-by-gene using only microarray probes and  
288 epiGBS fragments that could be mapped to the *S. alterniflora* transcriptome. We regressed the  
289 expression values of each gene against the methylation frequencies and most common allele  
290 frequencies at corresponding epiGBS fragments using the *lm* function in R with the formula  
291 (gene expression ~ *cis* methylation + *cis* SNP). We summarized variation across each epiGBS

292 fragment for multiple SNP or methylation loci by using the first principal component of each  
293 data type. We interpreted significant effects of SNPs or DNA methylation to mean that the  
294 expression of a given gene depended on the frequency of the nucleotide or methylation  
295 polymorphism. We corrected for false discovery using qvalue (Storey *et al.*, 2015).

296

## 297 **Results**

### 298 *epiGBS yields informative genetic and methylation loci*

299 Following library preparation, we removed four samples due to stochastic under-  
300 sequencing. The libraries for 44 individuals (Table 1) generated 6,809,826 total raw sequencing  
301 reads, of which 3,833,653 (56.3%) could be matched to their original mate strand. *De novo*  
302 assembly using the epiGBS pipeline resulted in 36,131 contiguous fragments (19-202 basepairs)  
303 with a total length of 5,441,437 bp (Figs. **S1**, **S2**). Given the size of the *S. alterniflora* genome  
304 (2C values = 4.3 pg; Fortune *et al.*, 2008), our epiGBS approach assayed approximately 0.3% of  
305 the genome. However, fragments that were >90% similar were merged, and polyploid  
306 homeologs may have been concatenated. With BLAST, we found 10,103 fragments mapped to  
307 2,718 transcripts in *S. alterniflora* transcriptome. We found no bias in mapping to particular gene  
308 regions (Fig. **S3**), but 1,571 transcripts (57.8%) contained multiple epiGBS fragments that align  
309 to the same place, and 296 (10.9%) contained multiple epiGBS fragments that mapped to  
310 different places within the same gene. We suspect that multiple epiGBS fragments map to the  
311 same location because some epiGBS contiguous fragments represent different homeologs of the  
312 same region, which mapped to the same location. Only 1% of reads map to repetitive elements,  
313 confirming that *Pst*I-fragmented libraries were biased away from highly methylated, repetitive  
314 regions (van Gurp *et al.*, 2016).

315

### 316 *Genetic differentiation*

317 Our initial sequencing run yielded 171,205 SNPs across all individuals. After filtering to  
318 common loci and removing invariant sites, we imputed 10-25% missing genetic data and 10-50%  
319 methylation data per sample (Fig. **S4**), resulting in 6,521 SNP loci. We hypothesize that this  
320 significant data loss after filtering was due to insufficient sampling depth across an exceptionally  
321 large hexaploid genome, and a preponderance of restriction sites. Of these 6,521 loci, 243 SNPs  
322 occurred in transcripts. Pairwise  $F_{ST}$  calculations showed that all sites were significantly different

323 from each other (Table 3), with no evidence of isolation by distance ( $P > 0.05$  for latitude,  
324 longitude, and interaction). As in our AFLP study, we found significant genetic differentiation  
325 that was correlated to oil exposure: oil exposure explained 7.9% of the variance in DNA  
326 sequence ( $P = 0.035$ , Table 2). These results are recapitulated in the MDS visualization, which  
327 shows partial separation of oil-exposed and unexposed sites along MDS axis 1 (Fig. 1). We  
328 found 42 SNPs that were significantly associated with oil exposure, including 6 that overlapped  
329 with the *S. alterniflora* transcriptome. Four of these genes were annotated in *O. sativa* (Table  
330 S1). After testing for homogeneity of group dispersion, we found no evidence of change in  
331 variance in oil-exposed populations ( $P = 0.696$ ).

332

### 333 *DNA methylation differentiation*

334 Our bisulfite sequencing yielded 1,402,083 cytosines that were polymorphic for  
335 methylation across our samples before filtering. After filtering our data to common loci as  
336 described above, we analyzed 19,577 polymorphic methylated loci, 5,836 of which occurred in  
337 the CG context, 5,069 in the CHG context, and 8,673 in the CHH context. These proportions of  
338 polymorphic loci did not change significantly due to oil exposure (Fig. 2). Methylation calls  
339 were collapsed for symmetric CG and CHG loci across “watson” and “crick” strands so that  
340 methylation on either one or both strands was considered as a single locus. A quarter of cytosines  
341 that showed methylation polymorphism (26.3%) were methylated in fewer than 5 individuals,  
342 suggesting that many cytosines were infrequently methylated or methylated only on some sub-  
343 genomes. We found significant methylation differentiation by oil exposure after controlling for  
344 population structure with principal components of genetic data ( $P = 0.022$ ). Oil explained 9.2% of  
345 the variation in methylation.

346 Using locus-by-locus tests, we found 14 differentially methylated positions (DMPs  
347 between exposure types ( $Q < 0.05$ , Fig. 3; Table S1). These loci occurred nearly equally in CG (4  
348 loci), CHG (5 loci), and CHH (5 loci) contexts, and no contexts were overrepresented relative to  
349 their distribution across all loci ( $P > 0.2$  for all tests). Among these significant loci, one was  
350 located within a fragment that mapped to the *S. alterniflora* transcriptome. In addition, four were  
351 located in one of three fragments that mapped to the *Oryza sativa* transcriptome (Table S1). Most  
352 of these 14 loci had small differences in the magnitude of methylation frequency changes  
353 (average 2.8% change between exposed and unexposed populations). However, one locus

354 experienced frequency changes of 30%, and was located in an actin filament depolymerization  
355 protein (Os03g56790; ADF2). We found no DMPs that mapped to the first 250 nucleotides of a  
356 fragment in exon 1, where DNA methylation may be particularly relevant to the differential  
357 expression of genes (Secco *et al.*, 2015).

358

### 359 *Correlations with gene expression*

360 Although 2,718 epiGBS fragments mapped to the *Spartina* transcriptome, none of these  
361 fragments overlapped with transcripts that showed expression differences correlated with  
362 exposure to the *DWH* oil spill (Alvarez *et al.*, 2018). Across all genes within a sample, we found  
363 no significant relationship between genetic distance with gene expression distance ( $P=0.185$ ,  
364 Mantel's  $R=0.1489$ ), but there was a correlation between patterns of methylation variation and  
365 genome wide gene expression ( $P=0.009$ , Mantel's  $R=0.2319$ ). We had expression data and either  
366 SNPs or methylation polymorphisms for only 54 genes, and we found no association between  
367 individual SNPs or methylation polymorphisms with expression *in cis*.

368

## 369 **Discussion**

370 *Spartina alterniflora* displays high levels of genetic and methylation variation across  
371 environmental conditions in its native range (Richards *et al.*, 2004; Hughes & Lotterhos, 2014;  
372 Foust *et al.*, 2016; Robertson *et al.*, 2017), providing substrate for both genetic and epigenetic  
373 response to pollution. We previously found that genetic structure and expression of 3,334 genes  
374 were correlated to exposure to the *DWH* oil spill, but genome-wide methylation variation was  
375 not (Robertson *et al.*, 2017; Alvarez *et al.*, 2018). Higher resolution epiGBS suggests that both  
376 genetic sequence and DNA methylation are correlated with crude oil exposure in *S. alterniflora*,  
377 and that changes in gene expression are more strongly correlated to genome-wide patterns of  
378 DNA methylation than population structure.

379

### 380 *Increased resolution of genetic and epigenetic response to the DWH*

381 Our study confirmed significant genetic differentiation between oil-exposed and  
382 unexposed sites. This type of genetic structure may reflect either stochastic mortality in oil-  
383 exposed areas that may result from a severe bottleneck, or a signature of selection for oil  
384 tolerance in affected populations. *Spartina alterniflora* is a highly stress tolerant plant, and

385 populations have persisted after exposure to the *DWH* oil spill, even after extensive dieback (Lin  
386 & Mendelsohn, 2012; Silliman *et al.*, 2012; Lin *et al.*, 2016). However, our genetic data suggest  
387 that at least some *S. alterniflora* genotypes were susceptible to crude oil stress, and either had not  
388 regrown at the time of sampling or experienced mortality as a result of oil exposure. Our genetic  
389 marker studies, combined with initial losses in live aboveground and belowground biomass,  
390 support the hypothesis of differential mortality (Lin *et al.*, 2016). Although we found no  
391 evidence for a reduction in genetic variation, which may indicate selection for tolerant  
392 genotypes, the polyploidy of *Spartina* makes accurate quantification of total genetic variation  
393 challenging. Further investigations will be required to confirm whether mortality varied by  
394 genotype, and whether the *DWH* oil spill was truly a selective event.

395         The DNA methylation differences that were correlated to oil exposure may reflect either  
396 the downstream effects of different genetic variants, a plastic regulatory response to oil exposure,  
397 or both. In another study of *S. alterniflora* populations, patterns of DNA methylation were more  
398 strongly correlated than genetic structure with microhabitat, and some response of DNA  
399 methylation to environment was independent of population structure (Foust *et al.*, 2016). In the  
400 oil contaminated populations, we identified a differentially expressed gene that was homologous  
401 to the histone methyltransferase SUVH5, which may modulate fitness effects during oil exposure  
402 (Alvarez *et al.*, 2018). Histone methylation is intimately linked to DNA methylation through the  
403 regulation of *DNA (cytosine-5)-methyltransferase CMT3* activity (Stroud *et al.*, 2013). Therefore,  
404 we hypothesized that the differential expression of SUVH5 in response to crude oil exposure  
405 would result in differences in DNA methylation variation. With the increase in resolution offered  
406 by the epiGBS data set (36,131 epiGBS fragments yielding 19,615 methylation loci compared to  
407 39 polymorphic MS-AFLP fragments), we found a previously unidentified genome-wide  
408 signature of methylation differentiation between oil affected and unaffected sites after  
409 controlling for population structure.

410

#### 411 *Epigenetic variation is correlated to genome wide patterns of gene expression*

412         We expected that our fragments would be biased toward coding regions of the genome,  
413 and that we would find DNA methylation was correlated with changes in gene function since  
414 fragments could overlap with the promoters or the 5' end of the coding regions of genes. We  
415 found that almost 1/3 (10,103 of the 36,131) epiGBS fragments mapped to the *S. alterniflora*

416 transcriptome. However, many transcripts contained multiple epiGBS fragments such that only  
417 2,718 transcripts were represented. None of these 2,718 genes overlapped with the 3,334 oil  
418 responsive genes from our previous transcriptome analysis (Alvarez *et al.*, 2018), and few  
419 fragments overlapped the 5' end of genes. Therefore, our expectation that we could correlate  
420 local methylation polymorphisms to expression of oil responsive genes was not fulfilled in this  
421 study. However, genome-wide patterns of DNA methylation are more strongly correlated than  
422 genetic structure with gene expression.

423         Combined, our results suggest that genetic variation and regulatory mechanisms may play  
424 a role in the response of *S. alterniflora* populations to crude oil pollution. Although we are  
425 unable to dissect causality, our data suggest one of two possibilities. In the first scenario, crude  
426 oil exposure may have generated genetic differentiation between oil exposed and unexposed  
427 populations, which in turn shaped patterns of gene expression. Differential transcription may  
428 then have generated divergent patterns of methylation, either through genetic variation in DNA  
429 methyltransferases (Dubin *et al.*, 2015), or through changes in gene expression affected by  
430 neighboring transposable element activity (*sensu* Secco *et al.*, 2015). In this scenario, DNA  
431 methylation patterns are generated by genetic variation and/or reflect expression variation (*sensu*  
432 Meng *et al.*, 2016; Niederhuth & Schmitz, 2017). In the second scenario, crude oil exposure may  
433 have affected genetic variation while simultaneously but independently inducing patterns of  
434 DNA methylation e.g. as a response to the genomic “shock” of crude oil exposure (Rapp &  
435 Wendel, 2005; Richards *et al.*, 2012b). This variation may modulate the plastic response of gene  
436 expression variation in this system, and reflect an induced regulatory shift in *S. alterniflora*,  
437 regardless of genetic background. Of course, these scenarios are not mutually exclusive. While  
438 more complex models of causation will require substantially more genomic resources than are  
439 currently available in *S. alterniflora*, reverse genetic screens and higher resolution surveys may  
440 help to discern the relative contributions and causal roles of methylation and genetic variation in  
441 genes of interest.

442

#### 443 *Reduced representation sequencing compared to AFLP*

444         As the field of ecological genomics matures, there is a pressing need to develop robust  
445 assays and statistically sound measures of population regulatory variation. Reduced  
446 representation methylation sequencing techniques are attractive for ecological genomics because

447 they can be used to infer genome wide patterns of both genetic and methylation variation without  
448 a high-quality reference genome (Robertson & Richards, 2015; Richards *et al.*, 2017; Paun *et al.*,  
449 2018). However, considering the small portion of the genome that is sampled in these  
450 techniques, they still have serious limitations particularly for species that do not yet have a fully  
451 sequenced reference genome (Paun *et al.*, 2018).

452 We assessed the utility of epiGBS compared to MS-AFLP, and expected that the  
453 substantial increase in informative markers would confirm our results from our MS-AFLP study  
454 and lend greater resolution to detect patterns of DNA methylation variation. Our epiGBS survey  
455 detected significant differentiation in both genetic variation and DNA methylation that was  
456 correlated to oil exposure, suggesting that epiGBS provides increased resolution over MS-AFLP  
457 to detect genome-wide methylation differences in studies of similar sample sizes. However,  
458 despite the much larger data set generated by epiGBS compared to MS-AFLP, we only found 14  
459 differentially methylated positions, which is not substantial improvement over the five loci  
460 detected by MS-AFLP (Robertson *et al.*, 2017). The comparable number of DMPs and lack of  
461 power to evaluate *cis* association between methylation, genetic variation, and gene expression  
462 suggests that the ability to characterize individual functional elements remains obscured by  
463 substantial variation in methylation across individuals, and is limited by the small fraction (an  
464 estimated 0.3%) of the genome that is assayed. Further, although we may have biased sampling  
465 to coding regions of the genome, we found few fragments that overlapped the functionally  
466 relevant 5' end of transcripts. Without a reference genome for *S. alterniflora*, we were unable to  
467 identify fragments that overlapped promoter regions.

468 Sequencing-based techniques provide the potential to identify functional genomic  
469 regions, but correct annotations rely on genomic resources in a relevant reference. In polyploid  
470 species like *S. alterniflora*, a greater number of paralogs and the potential for  
471 neofunctionalization among them creates additional uncertainty for using annotations from other  
472 species (Primmer *et al.*, 2013). *Spartina alterniflora* has various levels of duplicated gene  
473 retention and homeologous expression (Ainouche *et al.*, 2003; Fortune *et al.*, 2007; Ferreira de  
474 Carvalho, 2013, 2017; Boutte *et al.*, 2016), which may result in more opportunities for gene  
475 diversification and subfunctionalization (Chen *et al.*, 2015; Shimizu-Inatsugi *et al.* 2017), and  
476 complicates gene annotation. Therefore, while studies with RRBS techniques in non-model  
477 plants offer increased power to detect broad, genome-wide patterns of variation that may be



478 correlated to ecology, they are still limited for the detection of specific gene function. Future  
479 studies will benefit from optimizing protocols that enrich for specific portions of the genome, but  
480 generating a draft reference genome will be imperative to locate the promoter regions and allow  
481 for better exploitation of RRBS data (Paun *et al.*, 2018).

482

### 483 **Acknowledgments**

484 We thank Steve Pennings, Brittney DeLoach McCall, Aaron Schrey, Christina Meals,  
485 and Ashley Shayter for access to field sites and assistance with plant sampling. We thank Acer  
486 Van Wallendael, Kieran Samuk, and Kate Ostevik for constructive feedback. This work was  
487 supported by funding from the National Science Foundation (U.S.A.) DEB-1419960 and IOS-  
488 1556820 (to CLR) and through the Global Invasions Network Research Exchange (Grant No.  
489 0541673 for MR), the Franco-American Fulbright Commission (to CLR), and the Netherlands  
490 Organisation for Scientific Research (NWO-ALW No. 820.01.025 to KJFV).

491 **Tables and Figures**

492

493 **Table 1** Sampling information across all sites after filtering.

| Site Location     | Site Code | Exposure      | No. of individuals |
|-------------------|-----------|---------------|--------------------|
| Grand Isle, LA    | GIN1      | None          | 7                  |
| Grand Isle, LA    | GIN2      | None          | 7                  |
| Barataria Bay, LA | GIO1      | Heavily Oiled | 8                  |
| Barataria Bay, LA | GIO2      | Heavily Oiled | 8                  |
| Bay St. Louis, MS | MSN       | None          | 7                  |
| Bay St. Louis, MS | MSO       | Heavily Oiled | 7                  |

494

495 Site information includes location and whether oil was observed at each site (exposure).

496 **Table 2** Association between oil exposure, genetic distance, and methylation distance across  
497 tests.

| Factor | df | Genetic |                    | Methylation |                    |
|--------|----|---------|--------------------|-------------|--------------------|
|        |    | F       | Variance explained | F           | Variance explained |
| oil    | 1  | 1.395 * | 0.079              | 1.960*      | 0.092              |

498

499 Test statistics and significance, determined through RDA. For clarity, we do not show  
500 significance for estimated surrogate variables (7 for methylation data, 16 for genetic data) or the  
501 8 principal components of allele frequencies for the methylation data.  $P^* \leq 0.05$ ,  $P^{**} \leq 0.01$ ,  $P$   
502  $^{***} \leq 0.0001$

503 **Table 3** Pairwise Fst among three oil contaminated and three uncontaminated sites. Bold (i.e. all  
504 entries) indicates significance at  $P < 0.001$ .

|      | GIN1          | GIN2          | MSN           | GIO1          | GIO2          |
|------|---------------|---------------|---------------|---------------|---------------|
| GIN2 | <b>0.1304</b> |               |               |               |               |
| MSN  | <b>0.1329</b> | <b>0.1421</b> |               |               |               |
| GIO1 | <b>0.1451</b> | <b>0.1264</b> | <b>0.1382</b> |               |               |
| GIO2 | <b>0.0966</b> | <b>0.1020</b> | <b>0.1198</b> | <b>0.1158</b> |               |
| MSO  | <b>0.1171</b> | <b>0.1471</b> | <b>0.1497</b> | <b>0.1580</b> | <b>0.1008</b> |

505

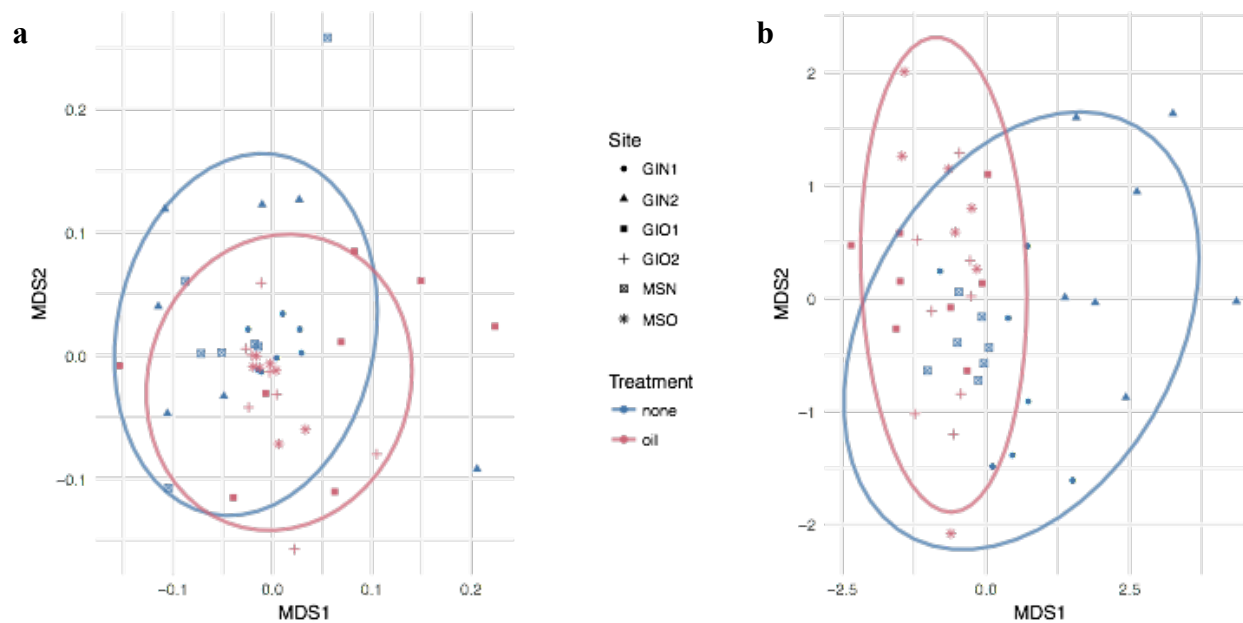

506 **Figure 1** Multidimensional scaling (MDS) of **a)** genetic distance matrix and **b)** DNA  
507 methylation distance matrix. Circles represent 95% confidence intervals around the centroid of  
508 each group: no oil exposure (“none”) or oil-exposed (“oil”).

509

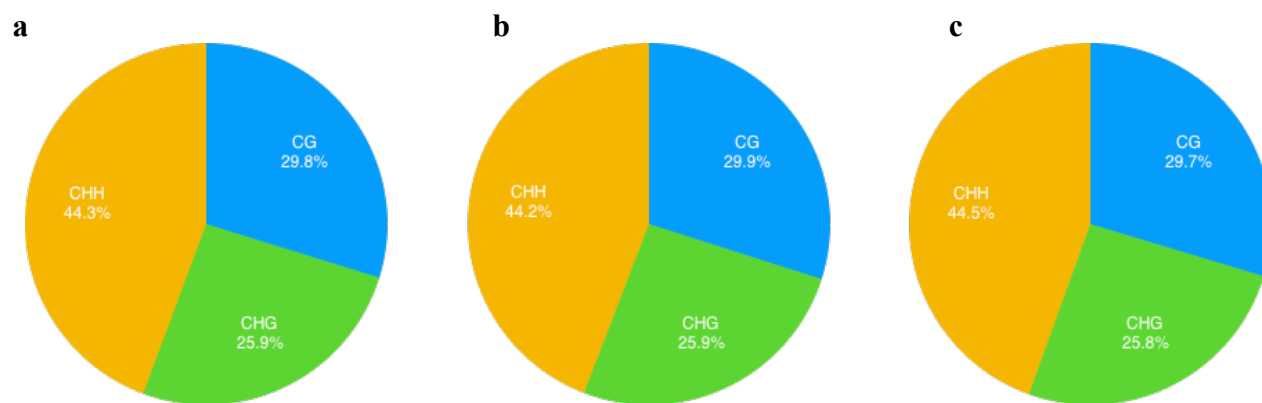

510  
511  
512  
513  
514

**Figure 2** Proportion of methylated sites by context across a) all samples, b) in uncontaminated sites and c) oil-contaminated sites.

515

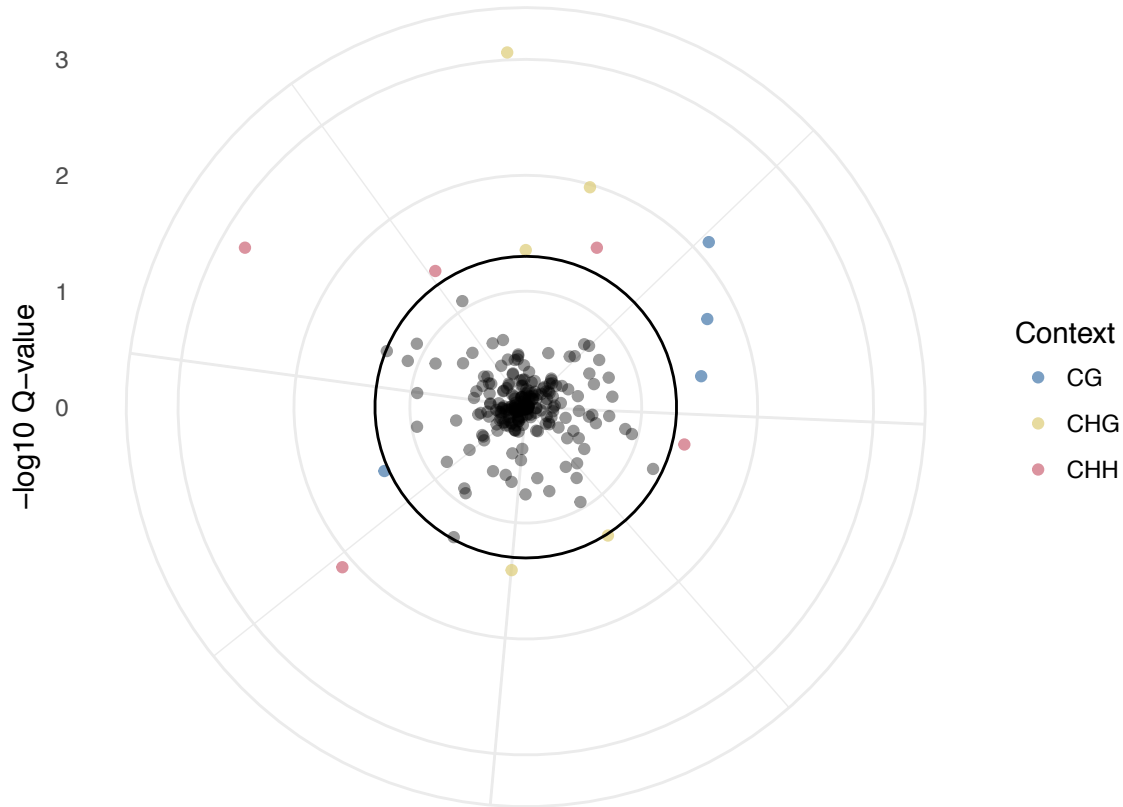

516

517

518 **Figure 3** Circular manhattan plot showing 14 significant outlier methylation loci, as determined  
519 by Q-value. Only significant loci ( $Q < 0.05$ ) are colored, where colors represent trinucleotide  
520 context. Plot is shown as circular to accommodate unknown positions along a chromosome, as *S.*  
521 *alterniflora* does not have a reference genome.

522

523 **Table S1** Genetic and methylation loci significantly differentially associated with oil exposure.

| Contiguous fragment | Position | Context | Q-value | <i>O. sativa</i> annotation | Gene name                                  |
|---------------------|----------|---------|---------|-----------------------------|--------------------------------------------|
| 3386                | 141      | -       | 0.0056  |                             |                                            |
| 5449                | 67       | -       | 0.0399  |                             |                                            |
| 7242                | 26       | -       | 0.0447  |                             |                                            |
| 8158                | 95       | -       | 0.016   |                             |                                            |
| 9488                | 45       | -       | 0.0339  |                             |                                            |
| 9488                | 51       | -       | 0.0421  |                             |                                            |
| 9488                | 94       | -       | 0.0385  |                             |                                            |
| 10931               | 43       | -       | 0.0385  |                             |                                            |
| 11792               | 111      | -       | 0.0339  |                             |                                            |
| 11939               | 123      | -       | 0.0033  | Os06g02570                  | Syntaxin, putative                         |
| 11972               | 49       | -       | 0.0327  |                             |                                            |
| 11974               | 102      | -       | 0.012   |                             |                                            |
| 11974               | 131      | -       | 0.0327  |                             |                                            |
| 12084               | 26       | -       | 0.0447  |                             |                                            |
| 12418               | 86       | -       | 0.0033  |                             |                                            |
| 13976               | 47       | -       | 0.0385  |                             |                                            |
| 14656               | 84       | -       | 0.0385  |                             |                                            |
| 14804               | 93       | -       | 0.0001  |                             |                                            |
| 14957               | 105      | -       | 0.012   |                             |                                            |
| 19335               | 34       | -       | 0.0032  |                             |                                            |
| 19759               | 76       | -       | 0.0447  |                             |                                            |
| 26805               | 111      | -       | 0.0466  |                             |                                            |
| 26906               | 41       | -       | 0.0009  |                             |                                            |
| 27016               | 91       | -       | 0.0421  | Os03g18220                  | pyruvate decarboxylase isozyme 2, putative |
| 27227               | 103      | -       | 0.0307  |                             |                                            |
| 28167               | 59       | -       | 0.0443  |                             |                                            |
| 28937               | 126      | -       | 0.0421  |                             |                                            |
| 28937               | 133      | -       | 0.0413  |                             |                                            |
| 28937               | 147      | -       | 0.0307  |                             |                                            |
| 30433               | 105      | -       | 0.013   |                             |                                            |
| 31126               | 85       | -       | 0.0181  |                             |                                            |
| 31126               | 147      | -       | 0.0174  |                             |                                            |
| 31604               | 78       | -       | 0.0421  |                             |                                            |
| 32215               | 52       | -       | 0.0033  |                             |                                            |
| 33738               | 102      | -       | 0.0218  |                             |                                            |
| 34288               | 53       | -       | 0.0001  | Os11g39230                  | retrotransposon protein, putative          |
| 34398               | 88       | -       | 0.0013  |                             |                                            |
| 34744               | 123      | -       | 0.0366  |                             |                                            |



|              |     |     |        |            |                                                                           |
|--------------|-----|-----|--------|------------|---------------------------------------------------------------------------|
| <b>35646</b> | 61  | -   | 0      | Os01g43070 | psbP-related thylakoid luminal protein 4, chloroplast precursor, putative |
| <b>36084</b> | 92  | -   | 0.0009 |            |                                                                           |
| <b>36084</b> | 96  | -   | 0.0447 |            |                                                                           |
| <b>36084</b> | 115 | -   | 0.0308 |            |                                                                           |
| <b>673</b>   | 43  | CG  | 0.0461 |            |                                                                           |
| <b>8098</b>  | 139 | CG  | 0.0291 |            |                                                                           |
| <b>11959</b> | 13  | CG  | 0.0182 | Os01g69980 | TCP family transcription factor, putative                                 |
| <b>34711</b> | 123 | CG  | 0.0075 |            |                                                                           |
| <b>183</b>   | 10  | CHG | 0.0443 |            |                                                                           |
| <b>527</b>   | 19  | CHG | 0.0388 | Os03g56790 | actin-depolymerizing factor, putative                                     |
| <b>4191</b>  | 107 | CHG | 0.0105 |            |                                                                           |
| <b>5540</b>  | 171 | CHG | 0.0482 |            |                                                                           |
| <b>7334</b>  | 97  | CHG | 0.0009 |            |                                                                           |
| <b>45</b>    | 82  | CHH | 0.0388 | Os03g51920 | peptidase, M50 family, putative                                           |
| <b>5540</b>  | 34  | CHH | 0.008  |            |                                                                           |
| <b>6013</b>  | 69  | CHH | 0.0016 | Os10g34480 | cytochrome P450, putative                                                 |
| <b>14227</b> | 11  | CHH | 0.0312 | Os08g38560 | receptor-like protein kinase 2 precursor, putative                        |
| <b>14776</b> | 15  | CHH | 0.0394 |            |                                                                           |

524

525 Only loci with Q-value <0.05 are shown. Trinucleotide context (CG, CHG, CHH) shown for  
 526 methylated loci. Gene numbers from *O. sativa* are shown for loci on fragments that were able to  
 527 annotated.

528

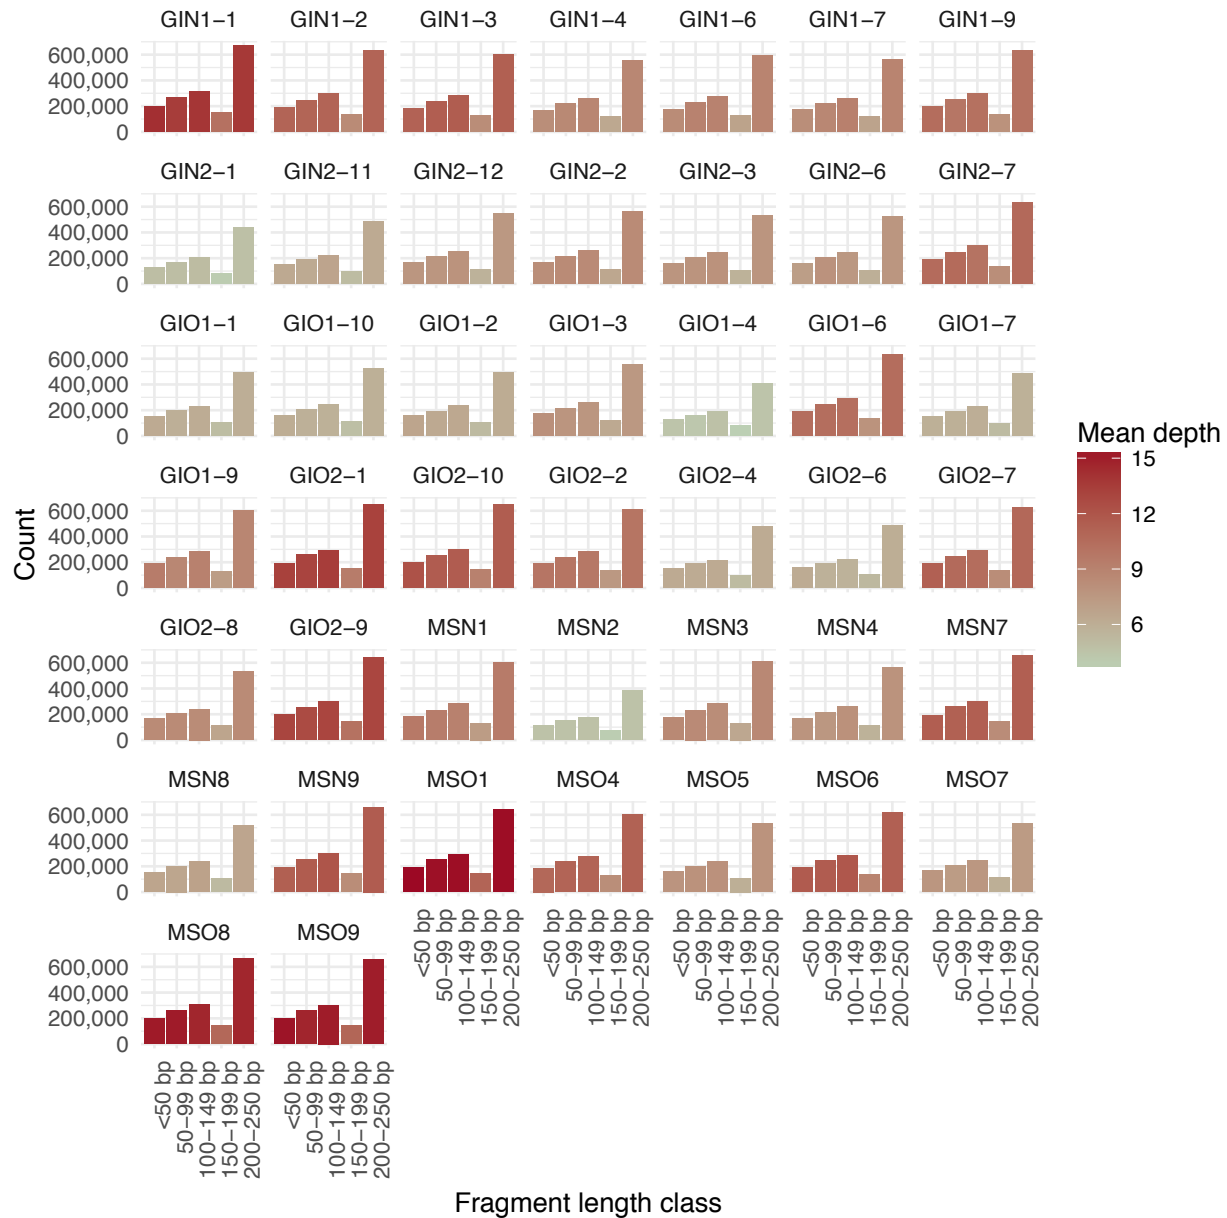

529

530

531 **Figure S1** Depth of sampling by fragment size in each sample across all fragments. Fragments  
 532 ranged from 19-202 basepairs (bp) for a total length of 5,441,437 bp (approximately 0.3% of the  
 533 2117 Mbp *S. alterniflora* genome (2C= 4.33pg); Fortune *et al.*, 2008). Fragments shown in  
 534 classes on the X axis.

535

536

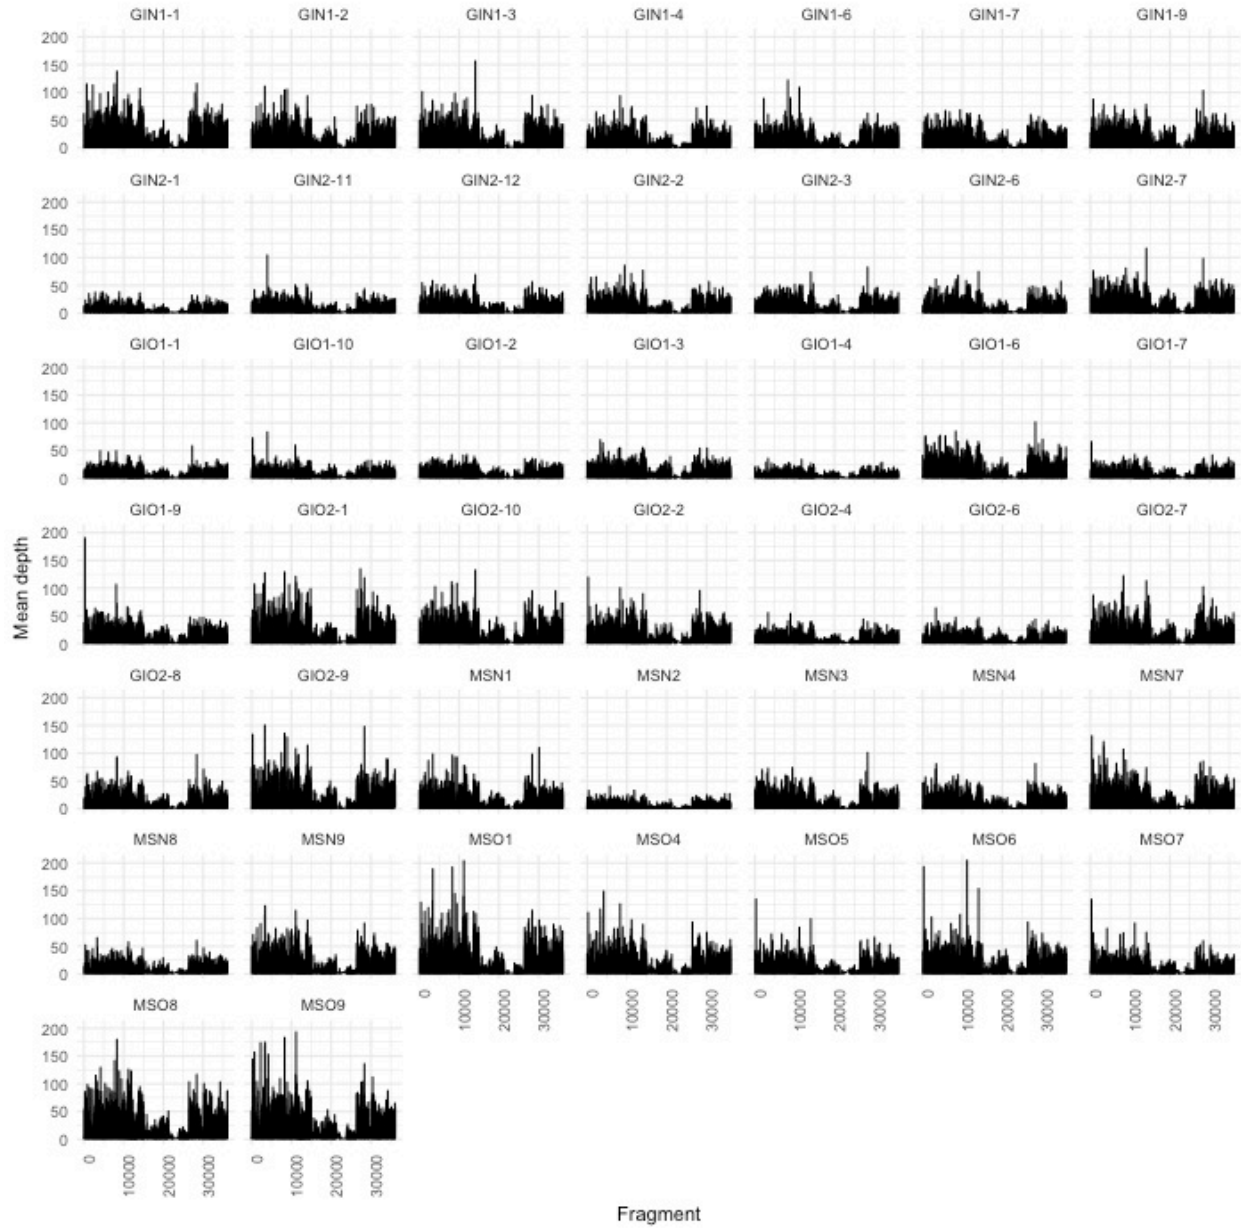

537

538 **Figure S2** Sequencing depth for each sample for each of the 36,131 fragments.

539

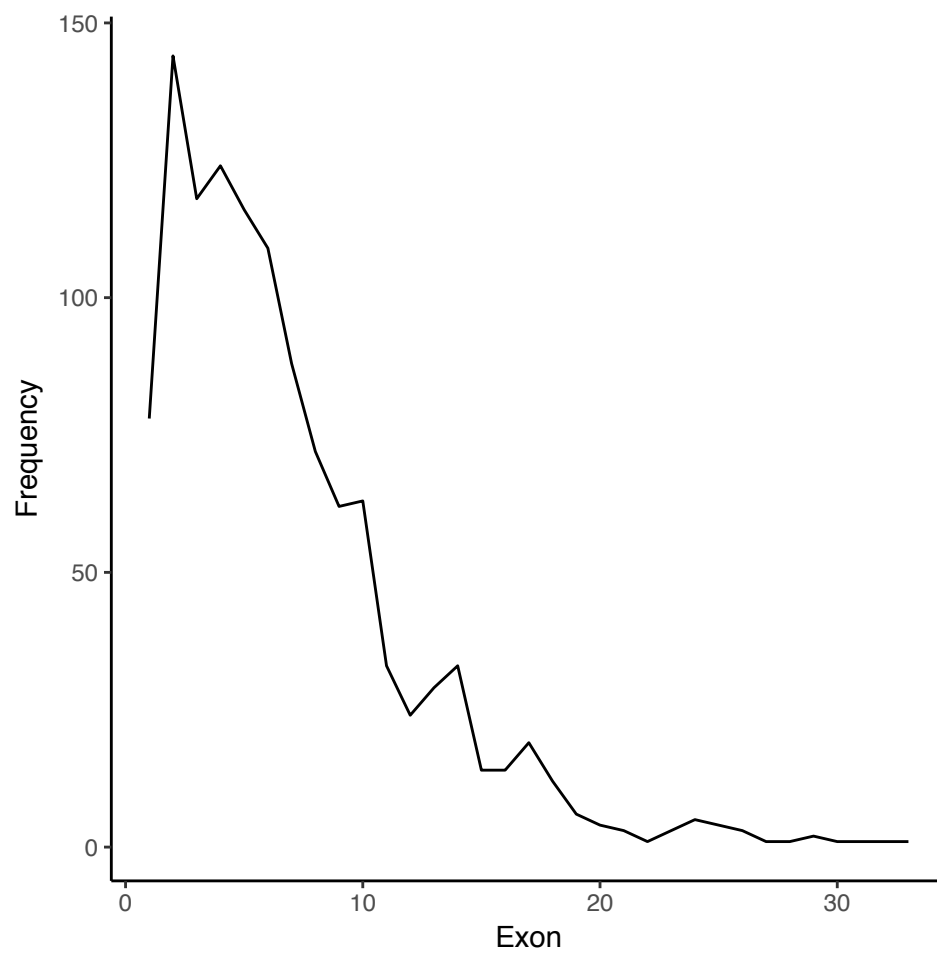

540  
541 **Figure S3.** Distribution of epiGBS hits across exons. Exon order is predicted by BLAST hits to  
542 *Oryza sativa*.  
543

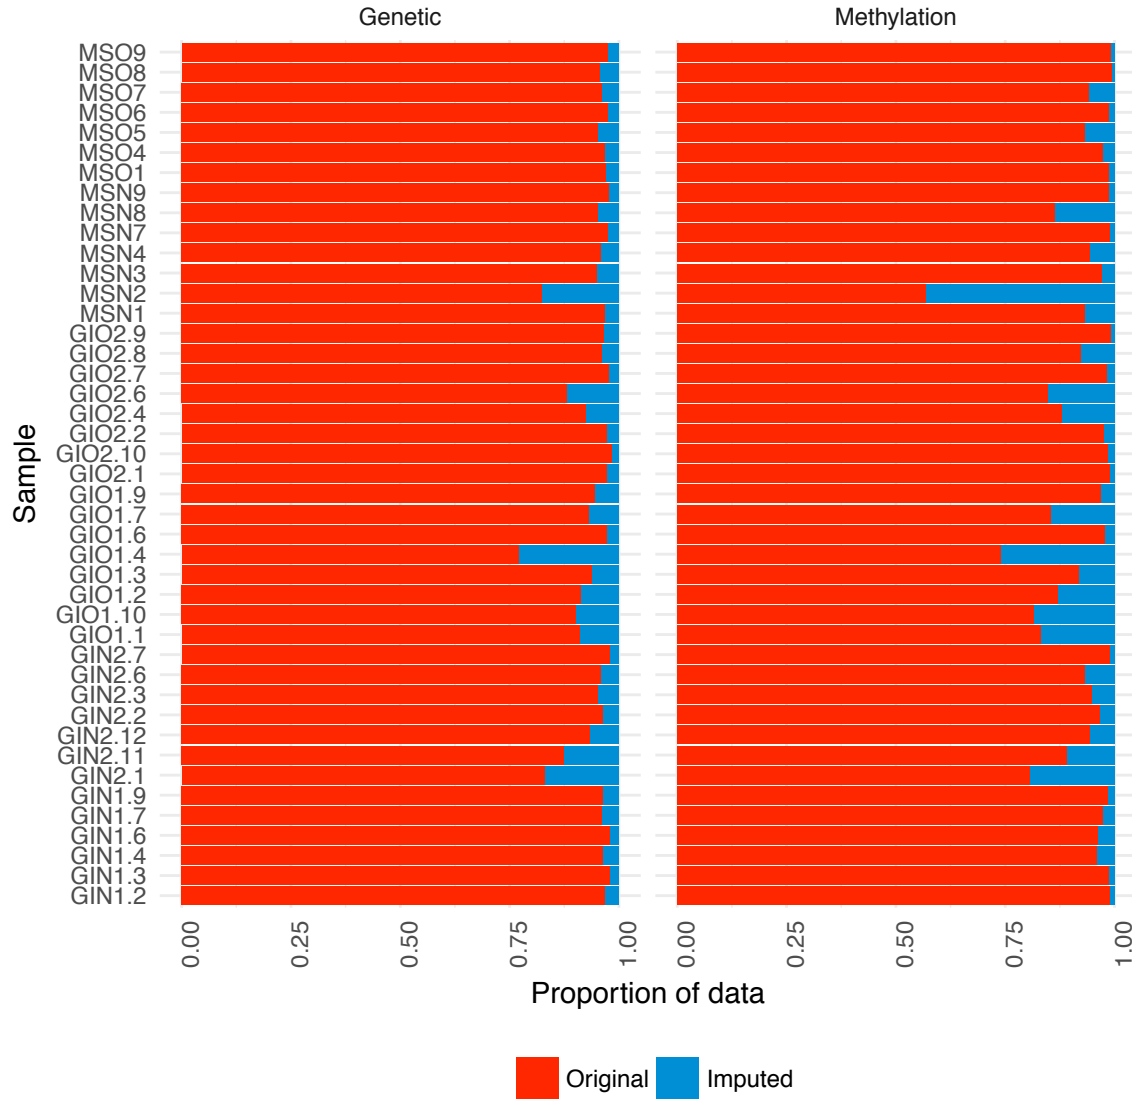

544

545 **Figure S4.** Missing and imputed data by sample after filtering. Genetic and methylation data  
546 were both filtered to include only loci present in >90% of samples and samples with less than  
547 50% missing data.

548

549 **References**

550

551 **Ainouche ML, Baumel A, Salmon A, Yannic G. 2003.** Hybridization, polyploidy and  
552 speciation in *Spartina* (Poaceae). *New Phytologist* **161**: 165-172.

553

554 **Ainouche ML, Fortune PM, Salmon A, Parisod C, Grandbastien MA, Fukunaga K, Ricou**  
555 **M, Misset MT. 2009.** Hybridization, polyploidy and invasion: lessons from *Spartina* (Poaceae).  
556 *Biological invasions* **11**: 1159. doi: 10.1007/s10530-008-9383-2

557

558 **Altschul SF, Madden TL, Schäffer AA, Zhang J, Zhang Z, Miller W, Lipman DJ. 1997.**  
559 Gapped BLAST and PSI-BLAST: a new generation of protein database search programs.  
560 *Nucleic Acids Research* **25**: 3389-3402.

561

562 **Alvarez M, Ferreira de Carvalho J, Salmon A, Ainouche ML, Cavé-Radet A, El Amrani A,**  
563 **Foster TE, Moyer S, Richards CL. 2018.** Transcriptome response to the *Deepwater Horizon*  
564 oil spill identifies novel candidate genes for oil tolerance in natural populations of the foundation  
565 plant *Spartina alterniflora*. *Molecular Ecology* doi: 10.1111/mec.14736

566

567 **Alvarez M, Schrey AW, Richards CL. 2015.** Ten years of transcriptomics in wild populations:  
568 what have we learned about their ecology and evolution?. *Molecular Ecology* **24**: 710-25. doi:  
569 10.1111/mec.13055

570

571 **Andrew RL, Bernatchez L, Bonin A, Buerkle CA, Carstens BC, Emerson BC, Garant D,**  
572 **Giraud T, Kane NC, Rogers SM et al. 2013.** A road map for molecular ecology. *Molecular*  
573 *Ecology* **22**: 2605-2626. doi: 10.1111/mec.12319

574

575 **Baisakh N, Subudhi PK. 2009.** Heat stress alters the expression of salt stress induced genes in  
576 smooth cordgrass (*Spartina alterniflora* L.). *Plant Physiology and Biochemistry:PPB* **47**: 232–  
577 235. doi: 10.1016/j.plaphy.2008.11.010

578

- 579 **Baisakh N, Subudhi PK, Varadwaj P. 2008.** Primary responses to salt stress in a halophyte,  
580 smooth cordgrass (*Spartina alterniflora* Loisel.). *Functional & Integrative Genomics* **8**: 287–  
581 300. doi: 10.1007/s10142-008-0075-x  
582
- 583 **Becker C, Weigel D. 2012.** Epigenetic variation: origin and transgenerational  
584 inheritance. *Current Opinion in Plant Biology* **15**: 562-567.  
585
- 586 **Bedre R, Mangu VR, Srivastava S, Sanchez LE, Baisakh N. 2016.** Transcriptome  
587 analysis of smooth cordgrass (*Spartina alterniflora* Loisel), a monocot halophyte, reveals  
588 candidate genes involved in its adaptation to salinity. *BMC Genomics* **17**: 657. doi:  
589 10.1186/s12864-016-3017-3  
590
- 591 **Boutte J, Ferreira de Carvalho J, Rousseau-Gueutin M, Poulain J, Da Silva C, Wincker P,**  
592 **Ainouche M, Salmon A. 2016.** Reference Transcriptomes and Detection of Duplicated Copies  
593 in Hexaploid and Allododecaploid *Spartina* Species (Poaceae). *Genome Biology and Evolution* **8**:  
594 3030–3044. doi: 10.1093/gbe/evw209  
595
- 596 **Chen X, Ge X, Wang J, Tan C, King GJ, Liu K. 2015.** Genome-wide DNA methylation  
597 profiling by modified reduced representation bisulfite sequencing in *Brassica rapa* suggests that  
598 epigenetic modifications play a key role in polyploid genome evolution. *Frontiers in Plant*  
599 *Science* **6**: 836.  
600
- 601 **Day JW, Boesch DF, Clairain EJ, Kemp GP, Laska SB, Mitsch WJ, Orth K, Mashriqui H,**  
602 **Reed DJ, Shabman L et al. 2007.** Restoration of the Mississippi Delta: lessons from hurricanes  
603 Katrina and Rita. *Science* **23**: 1679-84.  
604
- 605 **DeLeo DM, Herrera S, Lengyela SD, Quattrinia AM, Kulathinala RJ, Cordes EE. In press.**  
606 Gene expression profiling reveals deep-sea coral response to the *Deepwater Horizon* oil spill.  
607 *Molecular Ecology* doi: 10.1111/mec.14847.  
608

- 609 **DePristo MA, Banks E, Poplin R, Garimella KV, Maguire JR, Hartl C, Philippakis AA, Del**  
610 **Angel G, Rivas MA, Hanna M *et al.* 2011.** A framework for variation discovery and  
611 genotyping using next-generation DNA sequencing data. *Nature Genetics* **43**: 491-498.  
612
- 613 **Du J, Johnson LM, Jacobsen SE, Patel DJ. 2015.** DNA methylation pathways and their  
614 crosstalk with histone methylation. *Nature Reviews Molecular Cell Biology* **16**: 519-532. doi:  
615 10.1038/nrm4043  
616
- 617 **Dubin MJ, Zhang P, Meng D, Remigereau MS, Osborne EJ, Casale FP, Drewe P, Kahles**  
618 **A, Jean G, Vilhjálmsson B *et al.* 2015.** DNA methylation in Arabidopsis has a genetic basis and  
619 shows evidence of local adaptation. *Elife* **4**: e05255.  
620
- 621 **Dufresne F, Stift M, Vergilino R, Mable BK. 2014.** Recent progress and challenges in  
622 population genetics of polyploid organisms: an overview of current state of the art molecular  
623 and statistical tools. *Molecular Ecology* **23**: 40-69.  
624
- 625 **Feder ME, Mitchell-Olds T. 2003.** Evolutionary and ecological functional genomics. *Nature*  
626 *Reviews Genetics* **4**: 649.  
627
- 628 **Ferreira de Carvalho J, Poulain J, Da Silva C, Wincker P, Michon-Coudouel S, Dheilly A,**  
629 **Naquin D, Boutte J, Salmon A, Ainouche M. 2013.** Transcriptome de novo assembly from  
630 next-generation sequencing and comparative analyses in the hexaploid salt marsh species  
631 *Spartina maritima* and *Spartina alterniflora* (Poaceae). *Heredity* **110**: 181-193.  
632
- 633 **Ferreira de Carvalho J, Boutte J, Bourdaud P, Chelaifa H, Ainouche K, Salmon A,**  
634 **Ainouche M. 2017.** Gene expression variation in natural populations of hexaploid and  
635 allododecaploid *Spartina* species (Poaceae). *Plant Systematics and Evolution* **303**: 1061-1079.  
636
- 637 **Forester BR, Jones MR, Joost S, Landguth EL, Lasky JR. 2016.** Detecting spatial genetic  
638 signatures of local adaptation in heterogeneous landscapes. *Molecular ecology*, 25(1), 104-120.  
639



- 640 **Fortune PM, Schierenbeck KA, Ainouche AK, Jacquemin J, Wendel JF, Ainouche ML.**  
641 **2007.** Evolutionary dynamics of Waxy and the origin of hexaploid *Spartina* species (Poaceae).  
642 *Molecular Phylogenetics and Evolution* **43**: 1040–1055. doi: 10.1016/j.ympev.2006.11.018  
643
- 644 **Foust CM, Preite V, Schrey AW, Alvarez M, Robertson MH, Verhoeven KJF, Richards**  
645 **CL. 2016.** Genetic and epigenetic differences associated with environmental gradients in  
646 replicate populations of two salt marsh perennials. *Molecular Ecology* **25**: 1639-1652.  
647
- 648 **Goslee SC, Urban DL. 2007.** The ecodist package for dissimilarity-based analysis of ecological  
649 data. *Journal of Statistical Software* **22**: 1-19.  
650
- 651 **Hastie T, Tibshirani R, Narasimhan B, Chu G. 2018.** impute: Imputation for microarray  
652 data. R package version 1.54.0. doi: 10.18129/B9.bioc.impute  
653
- 654 **Hazen TC, Dubinsky EA, DeSantis TZ, Andersen GL, Piceno YM, Singh N, et al. 2010.**  
655 **Deep-sea oil plume enriches indigenous oil-degrading bacteria.** *Science* **330**: 204–208. doi:  
656 10.1126/science.1195979  
657
- 658 **Hughes AR, Inouye BD, Johnson MT, Underwood N, Vellend M. 2008.** Ecological  
659 consequences of genetic diversity. *Ecology Letters* **11**: 609-23.  
660
- 661 **Hughes AR, Lotterhos KE. 2014.** Genotypic diversity at multiple spatial scales in the  
662 foundation marsh species, *Spartina alterniflora*. *Marine Ecology Progress Series* **497**: 105–117.  
663 doi: 10.3354/meps10565  
664
- 665 **Jackson SA. 2017.** Epigenomics: dissecting hybridization and polyploidization. *Genome Biology*  
666 **18**: 117.  
667
- 668 **Kawahara Y, de la Bastide M, Hamilton JP, Kanamori H, McCombie WR, Ouyang S,**  
669 **Schwartz DC, Tanaka T, Wu J, Zhou S et al. 2013.** Improvement of the *Oryza sativa*  
670 Nipponbare reference genome using next generation sequence and optical map data. *Rice* **6**: 4.

671  
672 **Kimes NE, Callaghan AV, Aktas DF, Smith WL, Sunner J, Golding BT, et al. 2013.**  
673 Metagenomic analysis and metabolite profiling of deep-sea sediments from the Gulf of Mexico  
674 following the *Deepwater Horizon* oil spill. *Front. Microbiol.* 4:50. doi:  
675 10.3389/fmicb.2013.00050  
676  
677 **Kimes NE, Callaghan AV, Suflita JM, Morris PJ. 2014.** Microbial transformation of the  
678 *Deepwater Horizon* oil spill—past, present, and future perspectives. *Front. Microbiol.* 5:603.  
679 doi: 10.3389/fmicb.2014.00603.  
680  
681 **Lasky JR, Upadhyaya HD, Ramu P, Deshpande S, Hash CT, Bonnette J, Juenger TE,**  
682 **Hyma K, Acharya C, Mitchell SE et al. 2015.** Genome-environment associations in sorghum  
683 landraces predict adaptive traits. *Science Advances* 6: e1400218. doi: 10.1126/sciadv.1400218  
684  
685 **Lea AJ, Tung J, Zhou X. 2015.** A flexible, efficient binomial mixed model for identifying  
686 differential DNA methylation in bisulfite sequencing data. *PLoS Genetics* 11: e1005650.  
687  
688 **Leek J, McShane BB, Gelman A, Colquhoun D, Nuijten MB, Goodman SN. 2017.** Five ways  
689 to fix statistics. *Nature* 551: 557-559.  
690  
691 **Leek JT, Storey JD. 2007.** Capturing heterogeneity in gene expression studies by surrogate  
692 variable analysis. *PLoS Genetics* 3: e161.  
693  
694 **Liebl AL, Schrey AW, Richards CL, Martin LB. 2013.** Patterns of DNA methylation  
695 throughout a range expansion of an introduced songbird. *Integrative and Comparative Biology*  
696 53: 351-358. doi: 10.1093/icb/ict007  
697  
698 **Lin Q, Mendelssohn IA. 2012.** Impacts and recovery of the Deepwater Horizon oil spill on  
699 vegetation structure and function of coastal salt marshes in the northern Gulf of Mexico.  
700 *Environmental Science & Technology* 46: 3737-43.  
701

- 702 **Lin Q, Mendelssohn IA, Graham SA, Hou A, Fleeger JW, Deis DR. 2016.** Response of salt  
703 marshes to oiling from the Deepwater Horizon spill: Implications for plant growth, soil surface-  
704 erosion, and shoreline stability. *Science of the Total Environment* **1**: 369-77.  
705
- 706 **Maor GL, Yearim A, Ast G. 2015.** The alternative role of DNA methylation in splicing  
707 regulation. *Trends in Genetics* **31**: 274-80.  
708
- 709 **Matzke MA, Mosher RA. 2014.** RNA-directed DNA methylation: an epigenetic  
710 pathway of increasing complexity. *Nature Reviews Genetics* **15**: 394-408.  
711
- 712 **Meirmans, P. G. 2015.** Seven common mistakes in population genetics and how to avoid  
713 them. *Molecular ecology*, **24**: 3223-3231.  
714
- 715 **Mendelssohn IA, Andersen GL, Baltz DM, Caffey RH, Carman KR, Fleeger JW, Joye SB,**  
716 **Lin Q, Maltby E, Overton EB, Rozas LP. 2012.** Oil impacts on coastal wetlands: implications  
717 for the Mississippi River Delta ecosystem after the Deepwater Horizon oil spill. *BioScience* **62**:  
718 562-74.  
719
- 720 **Meng D, Dubin M, Zhang P, Osborne EJ, Stegle O, Clark RM, Nordborg M. 2016.** Limited  
721 contribution of DNA methylation variation to expression regulation in *Arabidopsis thaliana*.  
722 *PLoS Genetics* **12**: e1006141.  
723
- 724 **Michel J, Owens EH, Zengel S, Graham A, Nixon Z, Allard T, Holton W, Reimer PD,**  
725 **Lamarque A, White M et al. 2013.** Extent and degree of shoreline oiling: Deepwater Horizon  
726 oil spill, Gulf of Mexico, USA. *PloS One* **12**: e65087.  
727
- 728 **National Commission on the BP Deepwater Horizon Oil Spill. 2011.** Graham B,  
729 Reilly WK, Beinecke F, Boesch DF, Garcia TD, Murray CA, Ulmer F, eds. *Deep Water:*  
730 *The Gulf Oil Disaster and the Future of Offshore Drilling. Report to the President.* doi:  
731 10.1111/jols.12003/full  
732

- 733 **Nicotra AB, Atkin OK, Bonser SP, Davidson AM, Finnegan EJ, Mathesius U, Poot P,**  
734 **Purugganan MD, Richards CL, Valladares F *et al.* 2010.** Plant phenotypic plasticity in a  
735 changing climate. *Trends in Plant Science* **15**: 684-92.  
736
- 737 **Niederhuth CE\*, Bewick AJ\*, Ji L, Alabday M, Kim KD, Li Q, Rohr NA, Rambani A,**  
738 **Burke JM, Udall JA *et al.* 2016.** Widespread natural variation of DNA methylation within  
739 angiosperms. *Genome Biology* **17**: 194.  
740
- 741 **Niederhuth CE, Schmitz RJ. 2017.** Putting methylation in context: from genomes to gene  
742 expression in plants. *Biochemica et Biophysica Acta* **1**: 149–156. doi:  
743 10.1016/j.bbagr.2016.08.009  
744
- 745 **Novák P, Neumann P, Pech J, Steinhaisl J, Macas J. 2013.** RepeatExplorer: a Galaxy-based  
746 web server for genome-wide characterization of eukaryotic repetitive elements from next-  
747 generation sequence reads. *Bioinformatics* **29**: 792-793.  
748
- 749 **Oksanen J, Blanchet FG, Friendly M, Kindt R, Legendre P, McGlenn D, Minchin PR,**  
750 **O’Hara RB, Simpson GL, Solymos P *et al.* 2017.** vegan: Community Ecology Package. R  
751 package version 2.4-4. <https://CRAN.R-project.org/package=vegan>  
752
- 753 **Paun O, Verhoeven KJF, Richards CL. 2018.** Opportunities and limitations of reduced  
754 representation bisulphite sequencing in plant ecological epigenomics. *New Phytologist* doi:  
755 10.1111/nph.15388  
756
- 757 **Pedersen BS, Eyring K, De S, Yang IV, Schwartz DA. 2014.** Fast and accurate alignment of  
758 long bisulfite-seq reads. *arXiv preprint* arXiv:1401.1129.  
759
- 760 **Pembleton LW, Cogan NO, Forster JW. 2013.** StAMPP: an R package for calculation of  
761 genetic differentiation and structure of mixed-ploidy level populations. *Molecular Ecology*  
762 *Resources* **13**: 946-952.  
763

- 764 **Pennings SC, Bertness MD. 2001.** Salt Marsh Communities. In: Bertness MD, Gaines SD, Hay  
765 M, eds. *Marine Community Ecology*. Sunderland, Massachusetts: Sinauer Associates, 289-316.  
766  
767
- 768 **Primmer CR, Papakostas S, Leder EH, Davis MJ, Ragan, MA. 2013.** Annotated  
769 genes and nonannotated genomes: cross-species use of Gene Ontology in ecology and  
770 evolution research. *Molecular Ecology* **22**: 3216–3241. doi: 10.1111/mec.12309  
771
- 772 **Rapp RA, Wendel JF. 2005.** Epigenetics and plant evolution. *New Phytologist*. **168**: 81-91.  
773
- 774 **Richards CL, Alonso C, Becker C, Bossdorf O, Bucher E, Colomé-Tatché M, Durka W,  
775 Engelhardt J, Gaspar B, Gogol-Doring A et al. 2017.** Ecological plant epigenetics: Evidence  
776 from model and non-model species, and the way forward. *Ecology Letters* **20**: 1576-1590.  
777
- 778 **Richards CL, Hamrick JL, Donovan LA, Mauricio R. 2004.** Unexpectedly high clonal  
779 diversity of two salt marsh perennials across a severe environmental gradient. *Ecology Letters* **7**:  
780 1155–1162. doi: 10.1111/j.1461-0248.2004.00674.x  
781
- 782 **Richards CL, Schrey AW, Pigliucci M. 2012a.** Invasion of diverse habitats by few Japanese  
783 knotweed genotypes is correlated with high epigenetic differentiation. *Ecology Letters* **15**: 1016-  
784 1025.  
785
- 786 **Richards CL, Verhoeven KJF, Bossdorf O. 2012b.** Evolutionary significance of epigenetic  
787 variation. In: Wendel JF, Greilhuber J, Dolezel J, Leitch IJ, eds. *Plant Genome Diversity*.  
788 Springer, 257-274.  
789
- 790 **Robertson M, Richards C. 2015.** Opportunities and challenges of next-generation sequencing  
791 applications in ecological epigenetics. *Molecular Ecology* **24**: 3799-3801.  
792

- 793 **Robertson M, Schrey A, Shayter A, Moss CJ, Richards, C. 2017.** Genetic and epigenetic  
794 variation in *Spartina alterniflora* following the Deepwater Horizon oil spill. *Evolutionary*  
795 *Applications* **10**: 792-801.  
796
- 797 **Schoener TW. 2011.** The newest synthesis: understanding the interplay of evolutionary and  
798 ecological dynamics. *Science* **331**: 426-429.  
799
- 800 **Schrey AW, Alvarez M, Foust CM, Kilvitis HJ, Lee JD, Liebl AL, Martin LB, Richards**  
801 **CL, Robertson M. 2013.** Ecological Epigenetics: Beyond MS-AFLP. *Integrative and*  
802 *Comparative Biology* **53**: 340-50.  
803
- 804 **Secco D, Wang C, Shou H, Schultz MD, Chiarenza S, Nussaume L, Ecker JR, Whelan J,**  
805 **Lister R. 2015.** Stress induced gene expression drives transient DNA methylation changes at  
806 adjacent repetitive elements. *Elife* **4**: e09343  
807
- 808 **Shimizu-Inatsugi R, Terada A, Hirose K, Kudoh H, Sese J, Shimizu KK. 2017.** Plant  
809 adaptive radiation mediated by polyploid plasticity in transcriptomes. *Molecular Ecology* **26**:  
810 193-207. doi: 10.1111/mec.13738  
811
- 812 **Silliman BR, van de Koppel J, McCoy MW, Diller J, Kasozi GN, Earl K, Adams PN,**  
813 **Zimmerman AR. 2012.** Degradation and resilience in Louisiana salt marshes after the BP-  
814 Deepwater Horizon oil spill. *Proceedings of the National Academy of Sciences of the United*  
815 *States of America* **109**: 11234–11239. doi: 10.1073/pnas.1204922109  
816
- 817 **Storey JD, Bass AJ, Dabney A, Robinson D. 2015.** qvalue: Q-value estimation for false  
818 discovery rate control. R package version 2.6.0. <http://github.com/jdstorey/qvalue>  
819
- 820 **Stroud H, Greenberg MV, Feng S, Bernatavichute YV, Jacobsen SE. 2013.** Comprehensive  
821 analysis of silencing mutants reveals complex regulation of the Arabidopsis methylome. *Cell*  
822 **152**: 352-64.  
823

- 824 **Travis SE, Hester MW. 2005.** A space-for-time substitution reveals the long-term decline in  
825 genotypic diversity of a widespread salt marsh plant, *Spartina alterniflora*, over a span of 1500  
826 years. *Journal of Ecology* **93**: 417-430. doi: 10.1111/j.0022-0477.2005.00985.x  
827
- 828 **Underwood CJ, Choi K, Lambing C, Zhao X, Serra H, Borges F, Simorowski J, Ernst E,**  
829 **Jacob Y, Henderson IR et al. 2018.** Epigenetic activation of meiotic recombination near  
830 *Arabidopsis thaliana* centromeres via loss of H3K9me2 and non-CG DNA methylation. *Genome*  
831 *Research* **28**: 1-13.  
832
- 833 **van Gurp TP, Wagemaker NC, Wouters B, Vergeer P, Ouborg JN, Verhoeven KJ. 2016.**  
834 epiGBS: reference-free reduced representation bisulfite sequencing. *Nature Methods* **13**: 322-  
835 324.  
836
- 837 **Verhoeven KJ, Jansen JJ, van Dijk PJ, Biere A. 2010.** Stress-induced DNA methylation  
838 changes and their heritability in asexual dandelions. *New Phytologist* **185**: 1108-1018.  
839
- 840 **Wibowo AT, Becker C, Marconi G, Durr J, Price J, Haggmann J. et al. 2016.** Hyperosmotic  
841 stress memory in *Arabidopsis* is mediated by distinct epigenetically labile sites in the genome  
842 and is restricted in the male germline by DNA glycosylase activity. *eLife* **5**: e13546.  
843
- 844 **Whitehead A, Dubansky B, Bodinier C, Garcia TI, Miles S, Pilley C, Walter RB. 2012.**  
845 Genomic and physiological footprint of the Deepwater Horizon oil spill on resident marsh fishes.  
846 *Proceedings of the National Academy of Sciences* **109**: 20298–20302.  
847
- 848 **Whitham TG, Bailey JK, Schweitzer JA, Shuster SM, Bangert RK, LeRoy CJ, Lonsdorf**  
849 **EV, Allan GJ, DiFazio SP, Potts BM et al. 2006.** A framework for community and ecosystem  
850 genetics: from genes to ecosystems. *Nature Reviews Genetics* **7**: 510.  
851
- 852 **Xie HJ\*, Li H\*, Liu D, Dai WM, He JY, Lin S, Duan H, Liu LL, Chen SG, Song XL et al.**  
853 **2015.** *ICE1* demethylation drives the range expansion of a plant invader through cold tolerance  
854 divergence. *Molecular Ecology* **24**: 835-850. doi: 10.1111/mec.13067

855

856 **Yelina NE, Lambing C, Hardcastle TJ, Zhao X, Santos B, Henderson IR. 2015.** DNA

857 methylation epigenetically silences crossover hot spots and controls chromosomal domains of

858 meiotic recombination in Arabidopsis. *Genes & Development* **29**: 2183-2202.
