1 **Reduced representation characterization of genetic and epigenetic**  
2 **differentiation to oil pollution in the foundation plant *Spartina alterniflora***

3  
4 **Mariano Alvarez\***

5 Department of Biology, Duke University, Durham, NC, 27708, USA;  
6 marianoferdinandalvarez@gmail.com

7  
8 **Marta Robertson\***

9 IRHS-INRA 49071 Beaucouzé Cedex, France; marta.h.robertson@gmail.com

10  
11 **Thomas van Gurp**

12 Department of Terrestrial Ecology, Netherlands Institute of Ecology (NIOO-KNAW), Wageningen, the  
13 Netherlands; thomasvangurp@gmail.com

14  
15 **Niels Wagemaker**

16 Department of Experimental Plant Ecology, Radboud University, Nijmegen, the Netherlands;  
17 n.wagemaker@science.ru.nl

18  
19 **Delphine Giraud**

20 UMR CNRS 6553 ECOBIO, OSUR, Université de Rennes 1, Campus Scientifique de Beaulieu, 35042  
21 Rennes, France; delphine.giraud@univ-rennes1.fr

22  
23 **Malika L. Ainouche**

24 UMR CNRS 6553 ECOBIO, OSUR, Université de Rennes 1, Campus Scientifique de Beaulieu, 35042  
25 Rennes, France ; malika.ainouche@univ-rennes1.fr

26  
27 **Armel Salmon**

28 UMR CNRS 6553 ECOBIO, OSUR, Université de Rennes 1, Campus Scientifique de Beaulieu, 35042  
29 Rennes, France; armel.salmon@univ-rennes1.fr

30  
31 **Koen J. F. Verhoeven**

32 Department of Terrestrial Ecology, Netherlands Institute of Ecology (NIOO-KNAW), Wageningen, the  
33 Netherlands; k.verhoeven@nioo.knaw.nl

34  
35 **Christina L. Richards**

36 Department of Integrative Biology, University of South Florida, Tampa, FL 33620, USA; Plant  
37 Evolutionary Ecology group, University of Tübingen, D-72076 Tübingen, Germany; [clr@usf.edu](mailto:clr@usf.edu)

38  
39 \*indicates equal contribution by authors

40  
41  
42 **Running title:** Epigenomic response to pollution

43 **Keywords:** AFLP, DNA methylation, epiGBS, epigenetics, foundation species, oil pollution, salt marsh,  
44 *Spartina alterniflora*

45 **Type of article:** Letter

46 163 words in abstract, 5536 words in main text

47 85 references, 3 tables and 3 figures (2 supplementary tables, 2 supplementary figures)

48

49 **Correspondence:** Christina L. Richards, Department of Integrative Biology, University of South Florida,  
50 4202 East Fowler Avenue, Tampa, FL 33617, USA; phone: +001 813 974 5090; fax: +001 813 974 3263;  
51 [clr@usf.edu](mailto:clr@usf.edu)  
52

53 **Abstract**

54 Theory predicts that environmental challenges can shape the composition of populations, which  
55 is manifest at the molecular level. Previously, we demonstrated that oil pollution affected gene  
56 expression patterns and altered genetic variation in natural populations of the foundation salt  
57 marsh grass, *Spartina alterniflora*. Here, we used a reduced representation bisulfite sequencing  
58 approach, epigenotyping by sequencing (epiGBS), to examine relationships among DNA  
59 sequence, DNA methylation, gene expression, and exposure to oil pollution. We documented  
60 genetic and methylation differentiation between oil-exposed and unexposed populations,  
61 suggesting that the *Deepwater Horizon* oil spill may have selected on genetic variation, and  
62 either selected on epigenetic variation or induced particular epigenotypes and expression patterns  
63 in exposed compared to unexposed populations. In support of the potential for differential  
64 response to the *Deepwater Horizon* oil spill, we demonstrate genotypic differences in response to  
65 oil under controlled conditions. Overall, these findings demonstrate genetic variation, epigenetic  
66 variation and gene expression are correlated to exposure to oil pollution, which may all  
67 contribute to the response to environmental stress.

## 68 **Introduction**

69 Organismal interactions and response to environment are governed by molecular  
70 mechanisms, which are among the most basic levels of biological organization. Studies across a  
71 diversity of organisms have described the association of genetic variation with environmental  
72 factors (Andrew *et al.*, 2013; Feder & Mitchell-Olds, 2003). More recently, transcriptomics  
73 studies in natural populations have identified gene expression differences that are associated with  
74 phenotypic plasticity, genotype-by-environment interactions, and local adaptation, and that some  
75 of these differences are only elicited in natural environments (Alvarez, Schrey, & Richards,  
76 2015; Nagano *et al.* 2012, 2019; Nicotra *et al.*, 2010). Hence, gene expression variation, like  
77 genetic variation, can translate into trait variation that contributes to organismal performance  
78 with important population- and community-level ecological effects (Alvarez *et al.*, 2015;  
79 Hughes, Inouye, Johnson, Underwood, & Vellend, 2008; Schoener, 2011; Whitham *et al.*, 2006).

80 Additional layers of variation, including chromatin modifications, small RNAs, and other  
81 non-coding variants, can mediate changes in genotypic expression and phenotype. However, this  
82 type of variation is infrequently studied in natural settings (Alvarez *et al.* 2015; Kudoh 2016;  
83 Nagano *et al.* 2012, 2019; Richards *et al.*, 2017). DNA and chromatin modifications, such as  
84 DNA methylation, can also vary among individuals within populations (Banta & Richards, 2018;  
85 Becker & Weigel, 2012; Richards *et al.*, 2017), and contribute to phenotypic variation by  
86 modulating the expression of genes (Alvarez *et al.*, 2015, 2018), the types of transcripts that  
87 genes produce (Maor, Yearim, & Ast, 2015), the movement of mobile elements (Matzke &  
88 Moshier, 2014), and the production of structural variants (Underwood *et al.*, 2018 ; Yelina *et al.*,  
89 2015). At the same time, changes in genetic sequence or gene expression may cause variation in  
90 patterns of DNA methylation, creating a bidirectional relationship that varies across the genome  
91 (Meng *et al.*, 2016; Niederhuth & Schmitz, 2017; Secco *et al.*, 2015). Patterns of DNA  
92 methylation have been correlated to habitat types, exposure to stress, and shifts in species range  
93 (Foust *et al.*, 2016; Liebl, Schrey, Andrew, Sheldon, & Griffith, 2015; Liebl, Schrey, Richards,  
94 & Martin, 2013; Richards, Schrey, & Pigliucci, 2012; Verhoeven, Jansen, van Dijk, & Biere,  
95 2010; Weyrich, *et al.*, 2016; Xie *et al.*, 2015). However, it is often unclear whether changes in  
96 DNA methylation, and correlated changes in gene expression, are simply a downstream  
97 consequence of changes in allele frequencies or if they may manifest through other mechanisms.

98           In 2010, the *Deepwater Horizon* (*DWH*) oil spill developed into the largest marine oil  
99 spill in history (National Commission on the BP *Deepwater Horizon* oil spill, 2011), and became  
100 an opportunity to test ecological and evolutionary hypotheses in a diversity of organisms  
101 exposed to this recurrent anthropogenic stress (e.g. Alvarez *et al.* 2018; DeLeo *et al.* 2018;  
102 Hazen *et al.* 2010; Kimes *et al.* 2013; Kimes, Callaghan, Suflita & Morris, 2014; Robertson,  
103 Schrey, Shayter, Moss, & Richards, 2017; Rodriguez-R *et al.* 2015; Whitehead *et al.* 2012). A  
104 mixture of crude oil and dispersants made landfall along 1,773 kilometers on the shorelines of  
105 Louisiana, Mississippi, Alabama and Florida (Mendelssohn *et al.*, 2012; Michel *et al.*, 2013).  
106 Nearly half of the affected habitat was salt marsh, which supplies valuable ecosystem functions  
107 such as providing nurseries for birds and fish, and buffering storm and wave action (Day *et al.*,  
108 2007; Mendelssohn *et al.*, 2012; Michel *et al.*, 2013). Gulf of Mexico salt marshes are dominated  
109 by the hexaploid foundation plant species *Spartina alterniflora* ( $2n=6x=62$ ; Marchant, 1968),  
110 which is remarkably resilient to a variety of environmental stressors (Bedre, Mangu, Srivastava,  
111 Sanchez, & Baisakh, 2016; Cavé-Radet, Salmon, Lima, Ainouche, & El Amrani, 2018; Pennings  
112 & Bertness, 2001; Silliman *et al.*, 2012). Crude oil exposure from the *DWH* oil spill resulted in  
113 reduced carbon fixation, reduced transpiration, and extensive above-ground dieback in *S.*  
114 *alterniflora* populations (Lin & Mendelssohn, 2012; Silliman *et al.*, 2012), but oil-affected  
115 populations showed partial to complete recovery within seven months of the spill (Lin *et al.*,  
116 2016). However, the genomic and population level mechanisms that underlie this remarkable  
117 recovery have been poorly characterized.

118           In previous studies, we found that in *S. alterniflora* exposed to the *DWH* oil spill,  
119 pollution tolerance was correlated to changes in expression of a diverse set of genes, including  
120 epigenetic regulators and chromatin modification genes, such as a homolog of SUVH5 (Alvarez  
121 *et al.*, 2018). Although *S. alterniflora* populations were partially resilient to the *DWH* spill (Lin  
122 & Mendelssohn, 2012), we found evidence of genetic differentiation between individuals from  
123 oil-exposed areas and nearby uncontaminated areas (Robertson *et al.*, 2017). We expected that  
124 DNA methylation patterns would be divergent between oil exposed and unexposed populations,  
125 which might be induced by the environment or result from the genetic differences between  
126 exposed and unexposed populations. However, while a few DNA methylation loci (measured via  
127 methylation sensitive amplified fragment length polymorphism; MS-AFLP) were correlated with

128 oil exposure, we did not find genome-wide patterns in DNA methylation correlated with oil  
129 exposure in *S. alterniflora* (Robertson *et al.*, 2017).

130 In this study, we used a recently developed reduced representation bisulfite sequencing  
131 (RRBS) technique, epigenotyping by sequencing (epiGBS), to generate a more robust DNA  
132 sequence and DNA methylation data set (van Gurp *et al.*, 2016). We expected that the increased  
133 resolution, both in number and in detail of the markers, provided by this sequencing approach  
134 would confirm our previously observed patterns of genetic differentiation, and allow us to  
135 identify fine scale DNA methylation structure that was not apparent in our previous study. By  
136 aligning our fragments to the *S. alterniflora* transcriptomes (Boutte *et al.*, 2016; Ferreira de  
137 Carvalho *et al.*, 2013, 2017) and *Oryza sativa* genome (Kawahara *et al.*, 2013), we expected to  
138 assess the relationship between DNA methylation and previously reported gene expression. We  
139 predicted that we would find evidence that DNA methylation was correlated with changes in  
140 gene expression since some fragments might overlap with the coding regions of genes  
141 (Niederhuth & Bewick *et al.*, 2016). In addition, we examined the potential for response to  
142 selection by crude oil exposure among genotypes collected from the field in a common garden  
143 greenhouse experiment. We predicted that we would find variation in response to crude oil  
144 among genotypes, which would indicate existing standing variation in wild populations of *S.*  
145 *alterniflora* that could be acted upon by selection.

146

## 147 **Materials and Methods**

148

### 149 *Sample Collection*

150 We collected individuals from the leading edge of the marsh at three contaminated and  
151 three neighboring uncontaminated sites near Grand Isle, Louisiana and Bay St. Louis,  
152 Mississippi in August 2010, four months after the *DWH* oil spill as described in previous studies  
153 (Table 1; Alvarez *et al.*, 2018; Robertson *et al.*, 2017). These sites were naturally variable in  
154 conditions, but all sites supported monocultures of *S. alterniflora*. Contaminated sites were  
155 identified by the visual presence of oil on the sediment and substantial above-ground dieback of  
156 *S. alterniflora* on the leading edge of the marsh with *S. alterniflora* plants growing through the  
157 dead wrack. Nearby uncontaminated sites did not have any visible signs of the presence of oil or  
158 noticeable dieback of the above ground portions of *S. alterniflora*. Contamination status was

159 later confirmed via National Resource Damage Assessment databases (Robertson *et al.*, 2017).  
160 To standardize age and minimize developmental bias in sampling, we collected the third fully  
161 expanded leaf from each of eight individuals, spaced 10 meters apart at each of the six sites  
162 (N=48). Leaf samples were immediately frozen in liquid nitrogen to prevent degradation, and  
163 kept frozen during transport to the University of South Florida for processing and analysis.

164

#### 165 *DNA extractions and library prep*

166 We isolated DNA from each field-collected sample (N=48) using the Qiagen DNeasy  
167 plant mini kit according to the manufacturer's protocol. We prepared epiGBS libraries *sensu* van  
168 Gulp *et al.* (2016). Briefly, isolated DNA was digested with the enzyme PstI, which is sensitive  
169 to CHG methylation and biases resulting libraries toward coding regions (van Gulp *et al.*, 2016).  
170 After digestion, adapters containing methylated cytosines and variable barcodes were ligated to  
171 either end of the resulting fragments. We used the Zymo EZ Lightning methylation kit to  
172 bisulfite treat and clean the DNA. Libraries were then amplified with the KAPA Uracil Hotstart  
173 Ready Mix with the following PCR conditions: an initial denaturation step at 98°C for 1 min  
174 followed by 16 cycles of 98°C for 15s, 60°C for 30s, and 72°C for 30s, with a final extension of  
175 72°C for 5 min. We used rapid run-mode paired-end sequencing on an Illumina HiSeq2500  
176 sequencer using the HiSeq v4 reagents and the HiSeq Control software (v2.2.38), which  
177 optimizes the sequencing of low-diversity libraries (van Gulp *et al.*, 2016).

178

#### 179 *Data pre-processing and mapping to transcriptome*

180 We used the epiGBS pipeline (van Gulp *et al.*, 2016) to demultiplex samples, trim  
181 adapter sequences, assemble the *de novo* reference sequence, and call single nucleotide  
182 polymorphisms (SNPs) and DNA methylation polymorphisms (DMPs)  
183 (<https://github.com/thomasvangulp/epiGBS>). Sequencing depth varied substantially between  
184 samples, which we evaluated with a principal components analysis (PCA) on sampling depths  
185 across loci. We assumed that an approximately even spread of the samples across PC1 and PC2  
186 with no association of population or oil exposure, would indicate that sampling depth did not  
187 bias our downstream analyses (Figure S1). SNPs (the resulting snps.vcf file) and DMPs  
188 (methylation.bed) were filtered separately for each individual to include only loci that were  
189 sequenced a minimum of ten times (10x depth of coverage), while loci below this coverage were



190 considered missing data. We first removed 10 individuals with high amounts of missing data  
191 (>80%), leaving 38 samples across all 6 populations (Table 1). We then retained only loci that  
192 were present in more than 50% of individuals, with no more than 70% missing from any one  
193 individual (Figure S2). During the course of this filtering, missing data were imputed via a k-  
194 nearest neighbors approach (impute, Hastie, Tibshirani, Narasimhan, & Chu, 2018). We also  
195 performed genome-wide analyses (redundancy analyses, explained below) a second time with  
196 stricter filtering parameters (no more than 50% missing data in any individual, and no more than  
197 20% missing data at each locus, leaving 34 individuals) and obtained nearly identical P-values  
198 and F-statistics, although percent variance explained was reduced (Supplementary File 1).

199 All fragments were mapped to the published *S. alterniflora* transcriptome (Boutte *et al.*,  
200 2016) and the *O. sativa* genome (Michigan State University version 7, Kawahara *et al.*, 2013)  
201 using BLAST (Altschul *et al.*, 1997). We used BLAST (Altschul *et al.*, 1997) and  
202 RepeatExplorer (Novak, Neumann, Pech, Steinhaisl, & Macas, 2013) to compare our sequenced  
203 fragments to the *S. alterniflora* transcriptome (Boutte *et al.*, 2016; Ferreira de Carvalho *et al.*,  
204 2013, 2017) and known repeat elements, respectively.

205

## 206 *Population genetics*

207 All statistical analyses were performed in R v 3.5.3 (R Core Team, 2017). The epiGBS  
208 technique, and the sequencing design that we chose, did not provide sufficient sequencing depth  
209 to estimate hexaploid genotype likelihoods with confidence, particularly considering the lack of  
210 a high-quality reference genome (Boutte *et al.*, 2016; Dufresne *et al.*, 2014). We therefore used  
211 the frequency of the most common allele within an individual at each polymorphic locus as a  
212 substitute for genotype at each locus. Although this method ignores the various types of partial  
213 heterozygosity that are possible in hexaploid *S. alterniflora*, methods do not currently exist for  
214 accurate estimation of heterozygosity in polyploids, and the majority of standard population  
215 genetic inference assumes diploidy. We assumed that the frequency of the most common allele  
216 was likely to underestimate diversity and therefore underestimate divergence between  
217 populations, making our tests of differentiation conservative (Meirmans, Liu, & van Tienderen,  
218 2018).

219 We obtained pairwise  $F_{ST}$  values between populations to test for significant  
220 differentiation (StAMPP, Pembleton, Cogan, & Forster, 2013). We also used distance-based



221 redundancy analysis (RDA function in the Vegan package v. 2.5-2; Oksanen *et al.* 2017) to  
222 minimize false positives (Meirmans, 2015) in assessing isolation by distance using the formula  
223 (genetic distance ~ latitude \* longitude). We visualized data using principal components analysis  
224 (PCA; Figure 1A).

225 To quantify the relationship between genome-wide variation and environmental  
226 conditions, we used partial constrained redundancy analysis (RDA, implemented with the RDA  
227 function in the Vegan package v. 2.5-2; Oksanen *et al.* 2017). RDA is a multivariate ordination  
228 technique that allowed us to assess the joint influence of all SNPs simultaneously, while  
229 effectively controlling for both population structure and false discovery (Forester, Lasky,  
230 Wagner, & Urban, 2018). The resulting “locus scores” correspond to the loadings of each SNP  
231 on to the constrained axis, which represents the variation that can be explained by the variable of  
232 interest (in this case, crude oil exposure). We attempted to control for variation among sites with  
233 a replicated sampling strategy, but rather than using a single term for “population”, we  
234 conditioned our ordination on variables identified by latent factor mixed models analysis using  
235 the LFMM package (Caye, Jumentier, Lepeule, & François, 2019), which provides a method to  
236 account for residual variation due to unmeasured differences among populations, including  
237 environmental variation, life history variation, and geographical separation (Leek *et al.*, 2017).  
238 We used RDA to fit our final model with the formula (SNP matrix ~ oil exposure +  
239 Condition(latent factors)). We used a permutational test (999 permutations; Oksanen *et al.* 2017)  
240 to assess the likelihood that oil-exposed and unexposed populations differed by chance, and  
241 visualized results using principal components analysis. We identified individual SNPs that were  
242 significantly correlated with oil contamination using the three standard deviation outlier method  
243 described by Forester *et al.* (2018). Finally, we tested for differences in genetic variation using  
244 the PERMDISP2 procedure (Vegan; Oksanen *et al.*, 2017), under the assumption that a  
245 significant reduction in genetic variation in oiled populations may be evidence of a bottleneck.

#### 246 247 *Methylation analysis*

248 During the filtering process, loci were annotated with their methylation context, but all  
249 contexts were pooled for distance-based analyses as well as multiple testing correction after  
250 locus-by-locus modeling. We tabulated methylation frequency at each locus (methylated

251 cytosines/(methylated+unmethylated cytosines)), and visualized differences between samples  
252 with PCA (Figure 2A).

253 To identify signatures of DNA methylation variation that were correlated with oil  
254 exposure while controlling for genetic structure, we estimated latent variables with LFMM (Caye  
255 *et al.*, 2019) as above. In addition to the advantages described above, latent factor analysis (or the  
256 related surrogate variable analysis) provides a control for cell type heterogeneity in epigenomic  
257 studies (Akulenko, Merl, & Helms, 2016; Caye *et al.*, 2019; McGregor *et al.*, 2016). We then  
258 modeled the impact of oil exposure to genome-wide patterns of DNA methylation while  
259 controlling for latent variation as well as population structure via RDA (Vegan v. 2.5-2; Oksanen  
260 *et al.*, 2017) with the formula (methylation distance ~ oil exposure + Condition(latent factors) +  
261 the first 5 principal components).

262 To identify differentially methylated positions (DMPs) between contaminated and  
263 uncontaminated samples, we used binomial linear mixed modeling (MACAU; Lea, Tung, &  
264 Zhou, 2015), using the genetic relatedness matrix and latent factors as covariates to control for  
265 population structure. We corrected locus-specific P-values for multiple testing (qvalue v 2.14.1;  
266 Storey, Bass, Dabney, & Robinson, 2015), and tested for overrepresentation of cytosine contexts  
267 (CG, CHG, CHH) using binomial tests, implemented in R (R Core Team, 2017). Our epiGBS  
268 fragments rarely exceeded 200bp, and we were therefore unable to identify differentially  
269 methylated regions.

270

### 271 *Relationships to gene expression variation*

272 In a previous study using pools of individuals on a custom microarray, we found  
273 differential expression associated with response to the *DWH* in 3,334 out of 15,950 genes that  
274 were assessed in *S. alterniflora* (Alvarez *et al.*, 2018). In order to make the epiGBS data  
275 comparable to our pooled microarray design, we concatenated SNPs and methylation  
276 polymorphisms from individuals into *in silico* sample pools by averaging values at individual  
277 loci across the same three individuals within pools that were used in the gene expression  
278 analysis. We then calculated genetic, expression, and methylation distances between sample  
279 pools and used Mantel and partial Mantel tests to assess the relationship between all three data  
280 types and between methylation and expression, controlling for the effect of genetic distance  
281 (Vegan, Oksanen *et al.* 2017).

282 We also obtained the probability of whether significantly associated SNPs and  
283 methylation positions were likely to be overlapping differentially expressed genes (DEGs) by  
284 chance using a bootstrap method. We drew a number of random SNPs or methylated positions,  
285 with replacement, equal to the number of observed significantly associated SNPs or DMPs, and  
286 counted the number of loci that overlapped with DEGs in our previous study. This process was  
287 repeated 9999 times each for genetic and methylation data. We derived P-values by counting the  
288 number of times a value at least as large as the observed value appeared in the bootstrap  
289 resamples and dividing by the number of bootstrap replicates.

290

### 291 *Greenhouse oil response experiment*

292 We assessed the possibility that native *S. alterniflora* populations harbored genetic  
293 variation for the response to crude oil via a controlled greenhouse experiment. We collected 10  
294 *S. alterniflora* individuals that had been collected from two oil-naïve sites (“Cabretta” and  
295 “Lighthouse”) in the Sapelo Island National Estuarine Research Reserve in Georgia, USA, in  
296 May 2010. We collected plants that were spaced ten meters apart, maximizing the chance that  
297 individuals were of different genotypes (Foust *et al.*, 2016; Richards, Hamrick, Donovan, &  
298 Mauricio, 2004). We grew these individuals in pots under greenhouse conditions for at least  
299 three years before beginning our experiments and propagated multiple replicates of each  
300 genotype by rhizome cutting. Individual ramets were separated and potted in 4 inch pots in a 50-  
301 50 mixture of peat and sand (Cypress Creek, Tampa, USA; Alvarez, 2016).

302 We distributed three potted replicates of each of the 10 genotypes in each of two plastic  
303 containment chambers, for a total of 60 biological samples. One chamber received only  
304 uncontaminated fresh water, while the oil treatment chamber received 2.5% oil (sweet Louisiana  
305 crude) in 62 liters of water, which we previously determined would induce strong phenotypic  
306 response (Alvarez, 2016). Tides were simulated once per day by filling containment chambers  
307 with the water or water-oil mixture and allowing the fluid to drain into a catchment. We  
308 estimated biomass by tallying the number of living leaves and the number of living ramets when  
309 the experiment began, and again seven days after crude oil was added.

310

### 311 *Statistical analysis of greenhouse experiment*

312 We used generalized linear models (R Core Team 2017) with a Poisson error distribution  
313 to analyze the above-ground biomass at the end of the experiment (measured as the number of  
314 leaves and the number of ramets). Because *S. alterniflora* reproduces clonally, we assumed that  
315 biomass would represent a reasonable proxy of fitness in our species (Younginger, Sirova,  
316 Cruzan, & Ballhorn, 2017). We also included a covariate for the size of each plant at the start of  
317 the experiment, represented by the number of leaves and the number of ramets at the start of the  
318 experiment. Each model was written as (Phenotype<sub>Final</sub> ~ Treatment \* Genotype +  
319 Phenotype<sub>Initial</sub>), where asterisks represent main effects and all interactions. We did not explicitly  
320 test for differences between sites since admixture is high between sites on Sapelo Island and we  
321 found no evidence of genetic differentiation (Foust *et al.*, 2016). We assessed significance for  
322 main effects and interactions using type III tests. However, to identify individual genotypes  
323 responding more strongly than others, we conducted post-hoc pairwise comparisons, correcting  
324 for multiple testing using Holm’s correction for multiple testing (emmeans; Lenth, 2018).

325

## 326 **Results**

327

### 328 *epiGBS yields informative genetic and methylation loci*

329 The libraries for 48 individuals (Table 1) generated 6,809,826 total raw sequencing reads,  
330 of which 3,833,653 (56.3%) could be matched to their original mate strand. *De novo* assembly  
331 using the epiGBS pipeline resulted in 36,131 contiguous fragments ranging from 19-202 bp, an  
332 average length of 123.92 bp, and a total length of 5,441,437 bp. The size of the *S. alterniflora*  
333 genome is estimated to be 2C values = 6x = 4.2 GB (Fortune *et al.*, 2008), and current genomic  
334 analyses indicate that repetitive sequences (including transposable elements and tandem repeats)  
335 represent about 45% of the total analyzed genomic data set in *S. alterniflora* (Giraud *et al.*, *in*  
336 *prep*). Therefore, we estimate that our epiGBS approach assayed approximately 0.6% of the non-  
337 repetitive genome. However, fragments that were >90% similar were merged, and polyploid  
338 homeologs may have been concatenated. With BLAST, we found 10,103 fragments mapped to  
339 2,718 transcripts in the *S. alterniflora* transcriptome. We found that 1,571 transcripts (57.8%)  
340 contained multiple epiGBS fragments that align to the same place, and 296 (10.9%) contained  
341 multiple epiGBS fragments that mapped to different places within the same gene. We suspect  
342 that multiple epiGBS fragments map to the same location because some epiGBS fragments

343 represent different homeologs of the same region, which mapped to the same location. Only 1%  
344 of reads map to repetitive elements, confirming that *PstI*-fragmented libraries were biased away  
345 from highly methylated, repetitive regions (van Gurp *et al.*, 2016). The bisulfite non-conversion  
346 rate was calculated to be 0.36% of cytosines per position, and was estimated from lambda phage  
347 spike-in (van Gurp *et al.*, 2016). Although we found substantial variation in average sequencing  
348 depth among samples, we found no obvious non-random bias in sampling depth across samples  
349 (Figure S1). However, during filtering, we removed ten samples due to stochastic under-  
350 sequencing, leaving 38 samples for population analyses (Table 1, Figure S2).

351

### 352 *Genetic differentiation*

353 Our initial sequencing run yielded 171,205 SNPs across all individuals. After filtering to  
354 common loci, removing invariant sites, and imputing missing data (Figure S2), we obtained  
355 63,796 SNP loci. Of these, 5,753 SNPs occurred in transcripts. As in our AFLP study, we found  
356 significant genetic differentiation that was correlated to oil exposure: oil exposure explained  
357 23.4% of the variance in DNA sequence ( $P < 0.001$ , Figure 1A, B, Table 2), providing evidence  
358 that selection may have acted on these populations. Pairwise  $F_{ST}$  calculations showed that all  
359 sites were significantly different from each other (Table 3), with no evidence of isolation by  
360 distance ( $P > 0.05$  for latitude, longitude, and interaction). We found 1,631 SNPs that were  
361 significantly associated with oil exposure (defined by a locus score  $> 3$  standard deviation units  
362 away from the mean locus score; Forester *et al.*, 2018; Figure 1C), including 169 that overlapped  
363 with the *S. alterniflora* transcriptome. Of these loci, 41 were annotated using information from  
364 *O. sativa*, and contained a number of putative regulators of gene expression. Among significant  
365 loci, 1,324 differed in major allele frequency between exposed and unexposed populations by  
366 greater than 5%, and 334 by greater than 20% (Figure 1C). Significantly differentiated loci  
367 appeared no less likely to increase or decrease in major allele frequency based on exposure (809  
368 increasing vs 822 decreasing in frequency). We tested for homogeneity of group dispersion, and  
369 found no evidence of change in variance in oil-exposed populations ( $P = 0.512$ ).

370

### 371 *DNA methylation differentiation*

372 Our bisulfite sequencing yielded 1,402,083 cytosines that were polymorphic for  
373 methylation across our samples before filtering. After filtering our data to common loci as

374 described above, we analyzed 92,999 polymorphic methylated loci, 25,381 of which occurred in  
375 the CG context, 24,298 in the CHG context, and 43,030 in the CHH context (Figure 2C). An  
376 additional 290 had variable context because they co-occurred with a SNP. These proportions of  
377 polymorphic methylation loci did not change significantly due to oil exposure. Methylation calls  
378 were collapsed for symmetric CG and CHG loci across “watson” and “crick” strands so that  
379 methylation on either one or both strands was considered as a single locus. Although DNA  
380 methylation was strongly correlated with oil exposure (Table 2,  $P < 0.001$ ) when controlling only  
381 for latent factors, this differentiation was not significant after controlling for genetic population  
382 structure with principal components of genetic data (Table 2,  $P > 0.1$ ). In the latter model, oil  
383 explained 10% of the variation in methylation.

384 We found 240 DMPs that differed significantly between exposure types ( $Q < 0.05$ , Figure  
385 2C; Table S1). The number of observed DMPs in the CG context (125 loci) was significantly  
386 overrepresented relative to their occurrence in our data ( $P < 0.001$ ). We also found DMPs in CHG  
387 (57 loci), and CHH (58 loci) context, which was underrepresented among DMPs relative to their  
388 prevalence in all contigs ( $P < 0.001$ ). Among the significant loci, most had negligible differences  
389 in the magnitude of methylation frequency changes (average 1.4% change between exposed and  
390 unexposed populations). Only 29 experienced a change in magnitude of methylation greater than  
391 5%, and only 7 loci showed a change of greater than 20%. Additionally, 19 DMPs were located  
392 within a fragment that mapped to the *S. alterniflora* transcriptome, and 49 DMPs occurred in the  
393 same fragment as a significantly differentiated SNP. However, only 4 of those SNPs altered the  
394 trinucleotide context of DNA methylation.

395

### 396 *Correlations with gene expression*

397 We found no significant relationship between genetic distance and gene expression  
398 distance (Mantel’s  $R = 0.050$ ,  $P = 0.32$ ), between patterns of methylation variation and genome  
399 wide gene expression (Mantel’s  $R = 0.051$ ,  $P = 0.29$ ), or between methylation and genome wide  
400 expression when controlling for genetic variation (Mantel’s  $R = 0.014$ ,  $P = 0.41$ ). Only 14 SNPs  
401 that were significantly associated with oil exposure overlapped with DEGs correlated with  
402 exposure to the *DWH* oil spill (Alvarez *et al.*, 2018). However, our bootstrap test showed that  
403 this overlap could occur by chance ( $P > 0.79$ ). Therefore, our data suggests that if these SNPs are  
404 under selection, they are not necessarily regulating differential expression resulting from coding



405 changes in those genes. In addition, although 19 DMPs overlapped coding regions, only 3 of the  
406 DMPs corresponded to a DEG (Table S1), and our bootstrap test suggests that this was also  
407 likely to occur by chance ( $P > 0.5$ ). However, our data is limited to address the association  
408 between DNA methylation and differential expression of specific genes.

409

410 *Genotypes in common garden differ in their response to crude oil*

411 We found a significant effect of oil exposure on both the number of leaves ( $F = 13.09$ ,  $P <$   
412  $0.001$ ) and the number of ramets ( $F = 28.75$ ,  $P < 0.001$ ) at the end of the controlled greenhouse  
413 experiment. Type III tests showed significant genotype-by-treatment interactions for the number  
414 of leaves, but not ramets, at the end of the experiment, suggesting that individual genotypes vary  
415 in their response to crude oil exposure. Post-hoc comparisons identified two genotypes (C and G;  
416  $FDR < 0.05$ , Figure 3; Table S2) that lost a significantly greater number of leaves over the course  
417 of the experiment relative to other genotypes, further suggesting the presence of standing  
418 variation among individuals for the response to crude oil exposure.

419

## 420 Discussion

421 *Spartina alterniflora* displays high levels of genetic and DNA methylation variation  
422 across environmental conditions in its native range (Foust *et al.*, 2016; Hughes & Lotterhos,  
423 2014; Richards *et al.*, 2004; Robertson *et al.*, 2017), potentially providing substrate for both  
424 genetic and epigenetic response to pollution. We previously found that genetic structure and  
425 expression of 3,334 genes were correlated to exposure to the *DWH* oil spill, but genome-wide  
426 methylation variation was not (Alvarez *et al.*, 2018; Robertson *et al.*, 2017). Higher resolution  
427 epiGBS suggests that both genetic sequence and DNA methylation are correlated with crude oil  
428 exposure in *S. alterniflora*, but that differentiation in DNA methylation is primarily explained by  
429 differences in allele frequencies. Additionally, our greenhouse experiment shows phenotypic  
430 plasticity and genotypic variation in crude oil response, as measured by differential reduction in  
431 biomass between exposed and unexposed samples. These findings are consistent with genotype-  
432 specific mortality, and suggest that the *DWH* oil spill may have been a selective event in *S.*  
433 *alterniflora* populations.

434

435 *Genetic and epigenetic response to the DWH*



436 We found significant genetic differentiation between oil-exposed and unexposed sites,  
437 which may reflect either stochastic mortality in oil-exposed areas from a severe bottleneck, or a  
438 signature of selection for oil tolerance in affected populations. *Spartina alterniflora* displays high  
439 phenotypic plasticity, and populations have persisted after exposure to the *DWH* oil spill, even  
440 after extensive aboveground dieback (Lin & Mendelssohn, 2012; Lin *et al.*, 2016; Silliman *et al.*,  
441 2012). However, our studies and previous accounts of initial losses in live aboveground and  
442 belowground biomass (Lin *et al.*, 2016) suggest that some *S. alterniflora* genotypes were more  
443 susceptible than others to crude oil stress, and either had not regrown at the time of sampling or  
444 experienced mortality as a result of oil exposure. Although we found no evidence for a reduction  
445 in genetic variation, which may have further indicated selection for tolerant genotypes, the high  
446 ploidy of *S. alterniflora* makes accurate quantification of total genetic variation challenging.  
447 Further investigations are required to confirm the magnitude of selection, whether mortality  
448 varied by genotype, and if there was a reduction in genetic variation among oil-exposed  
449 populations.

450 DNA methylation differences may reflect either the downstream effects of genetic  
451 variants, an induced response to environment, or both (Meng *et al.*, 2016). For example, in  
452 another study of *S. alterniflora* populations, patterns of DNA methylation were more strongly  
453 correlated than genetic structure with microhabitat, and correlation of DNA methylation to  
454 environment was independent of population structure (Foust *et al.*, 2016). In this study, we found  
455 a multi-locus signature of methylation differentiation (17% of the variation explained by oil  
456 exposure) between oil-affected and unaffected sites before controlling for population structure.  
457 However, we found no association between methylation and crude oil contamination after  
458 controlling for genetic variation and latent effects, suggesting DNA methylation is controlled by  
459 genetic variation.

460 The observed variation in DNA methylation may be controlled by genetic variation via  
461 either a change in the nucleotide context, the presence or absence of particular alleles in *cis*, or  
462 variation in upstream regulatory elements. Allelic variation that changes trinucleotide context  
463 can alter or eliminate the ability of a methyltransferase to deposit methylation at that site.  
464 However, in our data, we did not find an enrichment of SNPs that affected trinucleotide context  
465 of DMPs. Concurrently, we did not detect an enrichment of oil-associated SNPs in DEGs, which  
466 we would expect if changes in the coding regions of those genes explain the observed gene

467 expression variation in oil-exposed individuals. However, our ability to assess the relationships  
468 between SNPs, SMPs and DEGs was limited by the distribution of our RRBS fragments. Further,  
469 changes in allele frequencies, due to either selection or drift, may have generated divergence in  
470 the regulatory machinery maintaining DNA methylation and gene expression profiles among  
471 exposed and unexposed populations.

472 Although we cannot disentangle whether differential expression causes alternative  
473 methylation patterns or vice versa, we previously identified a DEG that was homologous to the  
474 histone methyltransferase SUVH5, which may modulate fitness effects during oil exposure  
475 (Alvarez *et al.*, 2018). Histone methylation is linked to DNA methylation through the regulation  
476 of CHROMOMETHYLASE3 (CMT3) activity (Stroud, Greenberg, Feng, Bernatavichute, &  
477 Jacobsen, 2013). Given our previous results and those from the present study, we hypothesized  
478 that the differential expression of SUVH5 in response to crude oil exposure would result in  
479 differences in DNA methylation. These differences, in turn, may be maintained via genetic  
480 variation between exposed and unexposed populations either in the SUVH5 homolog itself, or  
481 more broadly within the CMT3-mediated pathway. However, targeted resequencing and further  
482 functional validation in the populations of interest will be required to confirm this hypothesis.

483

#### 484 *Reduced representation sequencing compared to AFLP*

485 As the field of ecological genomics matures, there is a pressing need to develop robust  
486 assays and statistically sound measures of regulatory variation. Reduced representation  
487 methylation sequencing techniques are attractive for ecological epigenomics because they can be  
488 used to infer genome wide patterns of both genetic and methylation variation without a high-  
489 quality reference genome (Paun, Verhoeven, & Richards, 2019; Richards *et al.*, 2017; Robertson  
490 & Richards, 2015; van Moorsel *et al.* 2019). However, they still have serious limitations  
491 particularly for species that do not yet have a fully sequenced reference genome (Paun *et al.*,  
492 2019). Furthermore, it is important to note that the limited number of loci surveyed may have led  
493 to a biased subsampling of the genome. In turn, this can lead to a poor estimation of the “neutral”  
494 level of divergence in the genome, and therefore a biased interpretation of divergence between  
495 these populations (Lowry *et al.*, 2017).

496 When comparing epiGBS to MS-AFLP, we expected that the substantial increase in  
497 markers (92,999 compared to 39 polymorphic methylation loci, respectively) would lend greater

498 resolution to detect patterns of DNA methylation variation. Our epiGBS survey detected  
499 significant differentiation in both genetic variation and DNA methylation that was correlated to  
500 oil exposure, suggesting that epiGBS provides increased resolution over MS-AFLP to detect  
501 genome-wide methylation differences. However, despite the much larger data set generated by  
502 epiGBS, we only found 240 differentially methylated positions. Although it would be valuable to  
503 identify associations between gene expression and nearby DNA methylation variation, the  
504 minimal overlap between our RRBS fragments and DEGs hindered our ability to associate  
505 methylation and gene expression variation. This is due to the small fraction of the genome that is  
506 assayed, substantial variation in methylation, and that we were unable to identify fragments that  
507 overlapped promoter regions without a reference genome.

508 Future RRBS studies will benefit from optimizing protocols that enrich for specific  
509 portions of the genome (*e.g.* Heer & Ullrich *et al.*, 2018), but generating a draft reference  
510 genome will be imperative to allow for better exploitation of RRBS data and ascertain gene  
511 function (Paun *et al.*, 2019). While sequencing-based techniques provide the potential to identify  
512 functional genomic regions, correct annotations rely on genomic resources in a relevant  
513 reference. In polyploid species like *S. alterniflora*, the number of duplicated genes and the  
514 potential for neofunctionalization among them creates additional uncertainty for correctly  
515 assigning annotations (Primmer, Papkostas, Leder, Davis & Ragan, 2013). *Spartina alterniflora*  
516 has various levels of duplicated gene retention, small RNA variation (including miRNAs and  
517 siRNAs) and homeologous expression (Ainouche, Baumel, Salmon, & Yannic 2003; Boutte *et*  
518 *al.*, 2016; Cavé-Radet, Giraud, Lima, El Amrani, Ainouche, & Salmon, 2019; Ferreira de  
519 Carvalho, 2013, 2017; Fortune *et al.*, 2007), which may result in more opportunities for gene  
520 diversification and subfunctionalization (Chen *et al.*, 2015; Salmon & Ainouche, 2015; Shimizu-  
521 Inatsugi *et al.*, 2017). Therefore, while studies with RRBS techniques in non-model plants offer  
522 increased power to detect broad, genome-wide patterns of variation that may be correlated to  
523 ecology, they are still limited for the detection of specific gene function. Improving genomics  
524 resources in a variety of organisms is an essential next step for understanding the molecular level  
525 basis of ecological interactions.

526

527 **Acknowledgments**

528 We thank Steve Pennings, Brittney DeLoach McCall, Aaron Schrey, Christina Moss, and  
529 Ashley Shayter for access to field sites and assistance with plant sampling. We thank Acer Van  
530 Wallendael, Kieran Samuk, and Kate Ostevik for constructive feedback. This work was  
531 supported by funding from the National Science Foundation (U.S.A.) DEB-1419960 and IOS-  
532 1556820 (to CLR) and through the Global Invasions Network Research Exchange (Grant No.  
533 0541673 for MR), the Franco-American Fulbright Commission (to CLR), and the Netherlands  
534 Organisation for Scientific Research (NWO-ALW No. 820.01.025 to KJFV).

535

### 536 **References**

- 537 1. Ainouche, M.L., Baumel, A., Salmon, A. & Yannic, G. (2003). Hybridization, polyploidy  
538 and speciation in *Spartina* (Poaceae). *New Phytologist*, 161, 165-172.  
539
- 540 2. Akulenko, R., Merl, M., & Helms, V. (2016). BEclear: batch effect detection and  
541 adjustment in DNA methylation data. *PloS one*, 11, p.e0159921.  
542
- 543 3. Altschul, S.F., Madden, T.L., Schäffer, A.A., Zhang, J., Zhang, Z., Miller, W., &  
544 Lipman, D.J. (1997). Gapped BLAST and PSI-BLAST: a new generation of protein  
545 database search programs. *Nucleic Acids Research*, 25, 3389-3402.  
546
- 547 4. Alvarez, M. (2016). *Molecular response of Spartina alterniflora to the Deepwater*  
548 *Horizon oil spill* (PhD thesis). University of South Florida, Tampa, FL.  
549
- 550 5. Alvarez, M., Ferreira de Carvalho, J., Salmon, A., Ainouche, M.L., Cavé-Radet, A., El  
551 Amrani, A., ... Richards, C.L. (2018). Transcriptome response to the *Deepwater Horizon*  
552 oil spill identifies novel candidate genes for oil tolerance in natural populations of the  
553 foundation plant *Spartina alterniflora*. *Molecular Ecology*. doi: 10.1111/mec.14736  
554
- 555 6. Alvarez, M., Schrey, A.W., & Richards, C.L. (2015). Ten years of transcriptomics in wild  
556 populations: what have we learned about their ecology and evolution?. *Molecular*  
557 *Ecology*, 24, 710-25. doi: 10.1111/mec.13055  
558
- 559 7. Andrew, R.L., Bernatchez, L., Bonin, A., Buerkle, C.A., Carstens, B.C., Emerson, B.C.,  
560 ... Rieseberg, L.H. (2013). A road map for molecular ecology. *Molecular Ecology*, 22,  
561 2605-2626. doi: 10.1111/mec.12319  
562
- 563 8. Banta, J.B., & Richards, C.L. (2018). Quantitative epigenetics and evolution. *Heredity*,  
564 121, 210–224. doi: 10.1038/s41437-018-0114-x  
565
- 566 9. Becker, C., & Weigel, D. (2012). Epigenetic variation: origin and transgenerational  
567 inheritance. *Current Opinion in Plant Biology* 15, 562-567.  
568

- 569 10. Bedre, R., Mangu, V.R., Srivastava, S., Sanchez, L.E., & Baisakh, N. (2016).  
570 Transcriptome analysis of smooth cordgrass (*Spartina alterniflora* Loisel), a monocot  
571 halophyte, reveals candidate genes involved in its adaptation to salinity. *BMC Genomics*,  
572 17, 657. doi: 10.1186/s12864-016-3017-3  
573
- 574 11. Boutte, J., Ferreira de Carvalho, J., Rousseau-Gueutin, M., Poulain, J., Da Silva, C.,  
575 Wincker, P., ... Salmon, A. (2016). Reference Transcriptomes and Detection of  
576 Duplicated Copies in Hexaploid and Allododecaploid *Spartina* Species (Poaceae).  
577 *Genome Biology and Evolution*, 8, 3030–3044. doi: 10.1093/gbe/evw209  
578
- 579 12. Cavé-Radet, A., Salmon, A., Lima, O., Ainouche, M.L., & El Amrani, A. (2018).  
580 Increased tolerance to organic xenobiotics following recent allopolyploidy in *Spartina*  
581 (Poaceae), *Plant Science*. doi: 10.1016/j.plantsci.2018.11.005  
582
- 583 13. Cavé-Radet, A., Giraud, D., Lima, O., El Amrani, A., Ainouche, M.L., & Salmon, A.  
584 (2019). Evolution of small RNA expression following hybridization and  
585 allopolyploidization: insights from *Spartina* species (Poaceae, Chloridoideae). *Plant Mol*  
586 *Biol.* doi: 10.1007/s11103-019-00931-w.  
587
- 588 14. Caye, K., Jumentier, B., Lepeule, J., & François, O. (2019). LFMM 2: fast and accurate  
589 inference of gene-environment associations in genome-wide studies. *Molecular biology*  
590 *and Evolution*, 36(4), 852-860.  
591
- 592 15. Chen, X., Ge, X., Wang, J., Tan, C., King, G.J., & Liu, K. (2015). Genome-wide DNA  
593 methylation profiling by modified reduced representation bisulfite sequencing in *Brassica*  
594 *rapa* suggests that epigenetic modifications play a key role in polyploid genome  
595 evolution. *Frontiers in Plant Science*, 6, 836.  
596
- 597 16. Day, J.W., Boesch, D.F., Clairain, E.J., Kemp, G.P., Laska, S.B., Mitsch, W.J., ...  
598 Dennis, F. (2007). Restoration of the Mississippi Delta: lessons from hurricanes Katrina  
599 and Rita. *Science*, 23, 1679-84.  
600
- 601 17. DeLeo, D.M., Herrera, S., Lengyela, S.D., Quattrinia, A.M., Kulathinala, R.J., & Cordes,  
602 E.E. (2018). Gene expression profiling reveals deep-sea coral response to the *Deepwater*  
603 *Horizon* oil spill. *Molecular Ecology*, 27, 4066–4077. doi: 10.1111/mec.14847  
604
- 605 18. Dufresne, F., Stift, M., Vergilino, R., & Mable, B.K. (2014). Recent progress and  
606 challenges in population genetics of polyploid organisms: an overview of current state-  
607 of-the-art molecular and statistical tools. *Molecular Ecology*, 23, 40-69.  
608
- 609 19. Feder, M.E., & Mitchell-Olds, T. (2003). Evolutionary and ecological functional  
610 genomics. *Nature Reviews Genetics*, 4, 649.  
611
- 612 20. Ferreira de Carvalho, J., Poulain, J., Da Silva, C., Wincker, P., Michon-Coudouel, S.,  
613 Dheilly, A., ... Ainouche, M. (2013). Transcriptome de novo assembly from next-  
614 generation sequencing and comparative analyses in the hexaploid salt marsh species  
615 *Spartina maritima* and *Spartina alterniflora* (Poaceae). *Heredity*, 110, 181-193.

- 616  
617  
618  
619  
620  
621  
622  
623  
624  
625  
626  
627  
628  
629  
630  
631  
632  
633  
634  
635  
636  
637  
638  
639  
640  
641  
642  
643  
644  
645  
646  
647  
648  
649  
650  
651  
652  
653  
654  
655  
656  
657  
658  
659  
660
21. Ferreira de Carvalho, J., Boutte, J., Bourdaud, P., Chelaifa, H., Ainouche, K., Salmon, A., & Ainouche, M. (2017). Gene expression variation in natural populations of hexaploid and allododecaploid *Spartina* species (Poaceae). *Plant Systematics and Evolution*, 303, 1061-1079.
  22. Forester, B.R., Lasky, J.R., Wagner, H.H., & Urban, D.L. (2018). Comparing methods for detecting multilocus adaptation with multivariate genotype–environment associations. *Molecular Ecology*, 27(9), 2215-2233.
  23. Fortune, P.M., Schierenbeck, K.A., Ainouche, A.K., Jacquemin, J., Wendel, J.F., & Ainouche, M.L. (2007). Evolutionary dynamics of Waxy and the origin of hexaploid *Spartina* species (Poaceae). *Molecular Phylogenetics and Evolution*, 43, 1040–1055. doi: 10.1016/j.ympev.2006.11.018
  24. Fortune, P.M., Schierenbeck, K.A., Ayres, D., Bortolus, A., Catrice, O., Brown, S., & Ainouche, M.L. (2008). The enigmatic invasive *Spartina densiflora*: A history of hybridizations in a polyploidy context. *Molecular Ecology*, 17, 4304–4316.
  25. Foust, C.M., Preite, V., Schrey, A.W., Alvarez, M., Robertson, M.H., Verhoeven, K.J.F., & Richards, C.L. (2016). Genetic and epigenetic differences associated with environmental gradients in replicate populations of two salt marsh perennials. *Molecular Ecology*, 25, 1639-1652.
  26. Hastie, T., Tibshirani, R., Narasimhan, B., & Chu, G. (2018). impute: Imputation for microarray data. R package version 1.54.0. doi: 10.18129/B9.bioc.impute
  27. Hazen, T.C., Dubinsky, E.A., DeSantis, T.Z., Andersen, G.L., Piceno, Y.M., Singh, N., ... Mason, O.U. (2010). Deep-sea oil plume enriches indigenous oil-degrading bacteria. *Science*, 330, 204–208. doi: 10.1126/science.1195979
  28. Heer, K.\*, Ullrich, K.K.\*, Hiss, M., Liepelt, S., Schulze-Brüning, R., Zhou, J., ... Rensing, S.A. (2018). Detection of somatic epigenetic variation in Norway spruce via targeted bisulfite sequencing. *Ecology and Evolution*, 8(19), 9672-9682. doi: 10.1002/ece3.4374
  29. Hughes, A.R., Inouye, B.D., Johnson, M.T., Underwood, N., & Vellend, M. (2008). Ecological consequences of genetic diversity. *Ecology Letters*, 11, 609-23.
  30. Hughes, A.R., & Lotterhos, K.E. (2014). Genotypic diversity at multiple spatial scales in the foundation marsh species, *Spartina alterniflora*. *Marine Ecology Progress Series*, 497, 105–117. doi: 10.3354/meps10565
  31. Kawahara, Y., de la Bastide, M., Hamilton, J.P., Kanamori, H., McCombie, W.R., Ouyang, S., ... Matsumoto, T. (2013). Improvement of the *Oryza sativa* Nipponbare



- 661 reference genome using next generation sequence and optical map data. *Rice*, 6(1), 4. doi:  
662 10.1186/1939-8433-6-4  
663
- 664 32. Kimes, N.E., Callaghan, A.V., Aktas, D.F., Smith, W.L., Sunner, J., Golding, B.T., ...  
665 Morris, P.J. (2013). Metagenomic analysis and metabolite profiling of deep-sea  
666 sediments from the Gulf of Mexico following the *Deepwater Horizon* oil spill. *Frontiers*  
667 *in Microbiology*, 4:50. doi: 10.3389/fmicb.2013.00050  
668
- 669 33. Kimes N.E., Callaghan A.V., Suflita J.M., & Morris P.J. 2014. Microbial transformation  
670 of the *Deepwater Horizon* oil spill—past, present, and future perspectives. *Front.*  
671 *Microbiol.* 5: 603. doi: 10.3389/fmicb.2014.00603  
672
- 673 34. Kudoh, H. (2016). Molecular phenology in plants: in natura systems biology for the  
674 comprehensive understanding of seasonal responses under natural environments. *New*  
675 *Phytologist*, 210, 399–412. doi: 10.1111/nph.13733  
676
- 677 35. Lea, A.J., Tung, J., & Zhou, X. (2015). A flexible, efficient binomial mixed model for  
678 identifying differential DNA methylation in bisulfite sequencing data. *PLoS Genetics*, 11,  
679 e1005650.  
680
- 681 36. Leek, J., McShane, B.B., Gelman, A., Colquhoun, D., Nuijten, M.B., & Goodman, S.N.  
682 (2017). Five ways to fix statistics. *Nature*, 551, 557-559.  
683
- 684 37. Lenth, R. (2018). Emmeans: Estimated marginal means, aka least-squares means. R  
685 Package Version 1.2.  
686
- 687 38. Liebl, A.L., Schrey, A.W., Richards, C.L., & Martin, L.B. (2013). Patterns of DNA  
688 methylation throughout a range expansion of an introduced songbird. *Integrative and*  
689 *Comparative Biology*, 53, 351-358. doi: 10.1093/icb/ict007  
690
- 691 39. Liebl, A.L., Schrey, A.W., Andrew, S.C., Sheldon, E.L., & Griffith, S.C. (2015). Patterns  
692 of DNA methylation throughout a range expansion of an introduced songbird. *Current*  
693 *Zoology*, 61(3), 465-476.  
694
- 695 40. Lin, Q., & Mendelsohn, I.A. (2012). Impacts and recovery of the Deepwater Horizon oil  
696 spill on vegetation structure and function of coastal salt marshes in the northern Gulf of  
697 Mexico, *Environmental Science & Technology*, 46, 3737-43.  
698
- 699 41. Lin, Q., Mendelsohn, I.A., Graham, S.A., Hou, A., Fleeger, J.W., & Dies, D.R. (2016).  
700 Response of salt marshes to oiling from the Deepwater Horizon spill: Implications for  
701 plant growth, soil surface-erosion, and shoreline stability. *Science of the Total*  
702 *Environment*, 1, 369-77.  
703
- 704 42. Lowry, D.B., Hoban, S., Kelley, J.L., Lotterhos, K.E., Reed, L.K., Antolin, M.F., &  
705 Storfer, A. (2017). Breaking RAD: an evaluation of the utility of restriction site-



- 706 associated DNA sequencing for genome scans of adaptation. *Molecular Ecology*  
707 *Resources*, 17, 142-152. doi: 10.1111/1755-0998.12635
- 708
- 709 43. Maor, G.L., Yearim, A., & Ast, G. (2015). The alternative role of DNA methylation in  
710 splicing regulation. *Trends in Genetics*, 31, 274-80.
- 711
- 712 44. Marchant, C.J. (1968). Evolution in *Spartina* (Gramineae). II. Chromosomes, basic  
713 relationships and the problem of *S. x townsendii* agg. *Botanical Journal of the Linnean*  
714 *Society*, 60, 381–409
- 715
- 716 45. Matzke, M.A., & Mosher, R.A. (2014). RNA-directed DNA methylation: an epigenetic  
717 pathway of increasing complexity. *Nature Reviews Genetics*, 15, 394-408.
- 718
- 719 46. McGregor, K., Bernatsky, S., Colmegna, I., Hudson, M., Pastinen, T., Labbe, A., &  
720 Greenwood, C.M. (2016). An evaluation of methods correcting for cell-type  
721 heterogeneity in DNA methylation studies. *Genome biology*, 17, 84.
- 722
- 723 47. Meirmans, P.G. (2015). Seven common mistakes in population genetics and how to avoid  
724 them. *Molecular Ecology*, 24, 3223-3231.
- 725
- 726 48. Meirmans, P.G., Liu, S., van Tienderen, P.H. (2018). The analysis of polyploid genetic  
727 data. *Journal of Heredity*, 109(3), 283-296. doi: 10.1093/jhered/esy006
- 728
- 729 49. Mendelssohn, I.A., Andersen, G.L., Baltz, D.M., Caffey, R.H., Carman, K.R., Fleegeer,  
730 J.W., ... Rozas, L.P. (2012). Oil impacts on coastal wetlands: implications for the  
731 Mississippi River Delta ecosystem after the Deepwater Horizon oil spill. *BioScience*, 62,  
732 562-74.
- 733
- 734 50. Meng, D., Dubin, M., Zhang, P., Osborne, E.J., Stegle, O., Clark, R.M., & Nordborg, M.  
735 (2016). Limited contribution of DNA methylation variation to expression regulation in  
736 *Arabidopsis thaliana*. *PLoS Genetics*, 12, e1006141.
- 737
- 738 51. Michel, J., Owens, E.H., Zengel, S., Graham, A., Nixon, Z., Allard, T., ... Taylor, E.  
739 (2013). Extent and degree of shoreline oiling: Deepwater Horizon oil spill, Gulf of  
740 Mexico, USA. *PloS One* 12: e65087. doi: 10.1371/journal.pone.0065087
- 741
- 742 52. Nagano, A.J., Sato, Y., Mihara, M., Antonio, B.A., Motoyama, R., Itoh, H., ... Izawa, T.  
743 (2012). Deciphering and prediction of transcriptome dynamics under fluctuating field  
744 conditions. *Cell*, 151, 1358–1369. doi: 10.1016/j.cell.2012.10.048
- 745
- 746 53. Nagano, A.J., Kawagoe, T., Sugisaka, J., Honjo, M.N., Iwayama, K., & Kudoh, H.  
747 (2019). Annual transcriptome dynamics in natural environments reveals plant seasonal  
748 adaptation. *Nature Plants*, 5, 74–83.
- 749
- 750 54. National Commission on the BP Deepwater Horizon Oil Spill. 2011. Graham B, Reilly  
751 WK, Beinecke F, Boesch DF, Garcia TD, Murray CA, Ulmer F, eds. *Deep Water: The*

- 752 *Gulf Oil Disaster and the Future of Offshore Drilling. Report to the President.* doi:  
753 10.1111/jols.12003/full  
754
- 755 55. Nicotra, A.B., Atkin, O.K., Bonser, S.P., Davidson, A.M., Finnegan, E.J., Mathesius, U.,  
756 ... van Kleunen, M. (2010). Plant phenotypic plasticity in a changing climate. *Trends in*  
757 *Plant Science*, 15, 684-92. doi: 10.1016/j.tplants.2010.09.008  
758
- 759 56. Niederhuth, C.E.\*, Bewick, A.J.\*, Ji, L., Alabday, M., Kim, K.D., Li, Q., ... Schmitz,  
760 R.J. (2016). Widespread natural variation of DNA methylation within angiosperms.  
761 *Genome Biology*, 17, 194. doi: 10.1186/s13059-016-1059-0  
762
- 763 57. Niederhuth, C.E., & Schmitz, R.J. (2017). Putting methylation in context: from genomes  
764 to gene expression in plants. *Biochemica et Biophysica Acta*, 1, 149–156. doi:  
765 10.1016/j.bbagr.2016.08.009  
766
- 767 58. Novák, P., Neumann, P., Pech, J., Steinhaisl, J., & Macas, J. (2013). RepeatExplorer: a  
768 Galaxy-based web server for genome-wide characterization of eukaryotic repetitive  
769 elements from next-generation sequence reads. *Bioinformatics*, 29, 792-793.  
770
- 771 59. Oksanen, J., Blanchet, F.G., Friendly, M., Kindt, R., Legendre, P., McGlenn, D., ...  
772 Wagner, H. (2017). vegan: Community Ecology Package. R package version 2.4-4.  
773 <https://CRAN.R-project.org/package=vegan>  
774
- 775 60. Paun, O., Verhoeven, K.J.F., & Richards, C.L. (2019). Opportunities and limitations of  
776 reduced representation bisulphite sequencing in plant ecological epigenomics. *New*  
777 *Phytologist*, 221, 738-742. doi: 10.1111/nph.15388  
778
- 779 61. Pembleton, L.W., Cogan, N.O., & Forster, J.W. (2013). StAMPP: an R package for  
780 calculation of genetic differentiation and structure of mixed-ploidy level populations.  
781 *Molecular Ecology Resources*, 13, 946-952.  
782
- 783 62. Pennings, S.C., & Bertness, M.D. (2001). Salt Marsh Communities. In: Bertness MD,  
784 Gaines SD, Hay M, eds. *Marine Community Ecology*. (pp 289-316). Sunderland,  
785 Massachusetts: Sinauer Associates.  
786
- 787 63. Primmer, C.R., Papakostas, S., Leder, E.H., Davis, M.J., & Ragan, M.A. (2013).  
788 Annotated genes and nonannotated genomes: cross-species use of Gene Ontology in  
789 ecology and evolution research. *Molecular Ecology*, 22, 3216–3241. doi:  
790 10.1111/mec.12309  
791
- 792 64. R Core Team (2017). R: A language and environment for statistical computing. R  
793 foundation for statistical computing, Vienna, Austria. <http://www.R-project.org/>  
794
- 795 65. Richards, C.L., Alonso, C., Becker, C., Bossdorf, O., Bucher, E., Colomé-Tatché, M., ...  
796 Verhoeven K.J.F. (2017). Ecological plant epigenetics: Evidence from model and non-  
797 model species, and the way forward. *Ecology Letters*, 20, 1576-1590.

- 798  
799  
800  
801  
802  
803  
804  
805  
806  
807  
808  
809  
810  
811  
812  
813  
814  
815  
816  
817  
818  
819  
820  
821  
822  
823  
824  
825  
826  
827  
828  
829  
830  
831  
832  
833  
834  
835  
836  
837  
838  
839  
840  
841  
842
66. Richards, C.L., Hamrick, J.L., Donovan, L.A., & Mauricio, R. (2004). Unexpectedly high clonal diversity of two salt marsh perennials across a severe environmental gradient. *Ecology Letters*, 7, 1155–1162. doi: 10.1111/j.1461-0248.2004.00674.x
67. Richards, C.L., Schrey, A.W., & Pigliucci, M. (2012). Invasion of diverse habitats by few Japanese knotweed genotypes is correlated with high epigenetic differentiation. *Ecology Letters*, 15, 1016-1025.
68. Robertson, M., & Richards, C.L. (2015). Opportunities and challenges of next-generation sequencing applications in ecological epigenetics. *Molecular Ecology*, 24, 3799-3801.
69. Robertson, M., Schrey, A., Shayter, A., Moss, C.J., & Richards, C.L. (2017). Genetic and epigenetic variation in *Spartina alterniflora* following the Deepwater Horizon oil spill. *Evolutionary Applications*, 10, 792-801.
70. Rodriguez-R, L.M., Overholt, W.A., Hagan, C., Huettel, M., Kostka, J.E., & Konstantinidis, K.T. (2015). Microbial community successional patterns in beach sands impacted by the Deepwater Horizon oil spill. *The ISME Journal*, 9, 1928-1940.
71. Salmon, A., & Ainouche, M. (2015). Next-generation sequencing and the challenge of deciphering evolution of recent and highly polyploid genomes. In: Horandl, E., & Appelhans, M. (eds.). *Next-Generation Sequencing in Plant Systematics*. Königstein, Germany: Koeltz Scientific Books. doi: 10.14630/000002
72. Schoener, T.W. (2011). The newest synthesis: understanding the interplay of evolutionary and ecological dynamics. *Science*, 331, 426-429.
73. Secco, D., Wang, C., Shou, H., Schultz, M.D., Chiarenza, S., Nussaume, L., ... Lister, R. (2015). Stress induced gene expression drives transient DNA methylation changes at adjacent repetitive elements. *Elife*, 4, e09343
74. Shimizu-Inatsugi, R., Terada, A., Hirose, K., Kudoh, H., Sese, J., & Shimizu, K.K. (2017). Plant adaptive radiation mediated by polyploid plasticity in transcriptomes. *Molecular Ecology*, 26, 193-207. doi: 10.1111/mec.13738
75. Silliman, B.R., van de Koppel, J., McCoy, M.W., Diller, J., Kasozi, G.N., Earl, K., ... Zimmerman, A.R. (2012). Degradation and resilience in Louisiana salt marshes after the BP-Deepwater Horizon oil spill. *Proceedings of the National Academy of Sciences of the United States of America*, 109, 11234–11239. doi: 10.1073/pnas.1204922109
76. Storey, J.D., Bass, A.J., Dabney, A., & Robinson, D. (2015). qvalue: Q-value estimation for false discovery rate control. R package version 2.6.0. <http://github.com/jdstorey/qvalue>

- 843 77. Stroud, H., Greenberg, M.V.C., Feng, S., Bernatavichute, Y.V., & Jacobsen, S.E. (2013).  
844 Comprehensive analysis of silencing mutants reveals complex regulation of the  
845 *Arabidopsis* methylome. *Cell*, 152, 352-364. doi: 10.1016/j.cell.2012.10.054  
846
- 847 78. Underwood, C.J., Choi, K., Lambing, C., Zhao, X., Serra, H., Borges, F., ... Martienssen,  
848 R.A. (2018). Epigenetic activation of meiotic recombination near *Arabidopsis thaliana*  
849 centromeres via loss of H3K9me2 and non-CG DNA methylation. *Genome Research*, 28,  
850 1-13.  
851
- 852 79. van Gorp, T.P., Wagemaker, N.C., Wouters, B., Vergeer, P., Ouborg, J.N., & Verhoeven,  
853 K.J. (2016). epiGBS: reference-free reduced representation bisulfite sequencing. *Nature*  
854 *Methods*, 13, 322-324.  
855
- 856 80. van Moorsel, S.J., Schmid, M.V., Wagemaker, C.A.M., van Gorp, T., Schmid, B.,  
857 Vergeer, P. (2019) Evidence for rapid evolution in a grass-land biodiversity experiment.  
858 *Molecular Ecology*, 28, 4097–4117. <https://doi.org/10.1111/mec.15191>  
859
- 860 81. Verhoeven, K.J., Jansen, J.J., van Dijk, P.J., & Biere, A. (2010). Stress-induced DNA  
861 methylation changes and their heritability in asexual dandelions. *New Phytologist*, 185,  
862 1108-1018.  
863
- 864 82. Weyrich, A., Lenz, D., Jeschek, M., Chung, T.H., Rübensam, K., Göritz, K., Jewgenow,  
865 K., Fickel, J. (2016) Paternal intergenerational epigenetic response to heat exposure in  
866 male Wild guinea. *Molecular Ecology – Special Issue on Epigenetic Studies in Ecology*  
867 *and Evolution*, 25, 1729–1740. doi: 10.1111/mec.13494  
868
- 869 83. Whitehead, A., Dubansky, B., Bodinier, C., Garcia, T.I., Miles, S., Pilley, C., & Walter,  
870 R.B. (2012). Genomic and physiological footprint of the Deepwater Horizon oil spill on  
871 resident marsh fishes. *Proceedings of the National Academy of Sciences*, 109, 20298–  
872 20302.  
873
- 874 84. Whitham, T.G., Bailey, J.K., Schweitzer, J.A., Shuster, S.M., Bangert, R.K., LeRoy, C.J.,  
875 ... Wooley, S.C. (2006). A framework for community and ecosystem genetics: from  
876 genes to ecosystems. *Nature Reviews Genetics*, 7, 510.  
877
- 878 85. Xie, H.J.\*, Li, H.\*, Liu, D., Dai, W.M., He, J.Y., Lin, S., ... Qiang, S. (2015). *ICE1*  
879 demethylation drives the range expansion of a plant invader through cold tolerance  
880 divergence. *Molecular Ecology*, 24, 835-850. doi: 10.1111/mec.13067  
881
- 882 86. Yelina, N.E., Lambing, C., Hardcastle, T.J., Zhao, X., Santos, B., & Henderson, I.R.  
883 (2015). DNA methylation epigenetically silences crossover hot spots and controls  
884 chromosomal domains of meiotic recombination in *Arabidopsis*. *Genes & Development*,  
885 29, 2183-2202.  
886
- 887 87. Younginger, B.S., Sirová, D., Cruzan, M.B., & Ballhorn, D.J. (2017). Is biomass a  
888 reliable estimate of plant fitness? *Applications in Plant Sciences*, 5(2), p.1600094  
889

890 **Tables and Figures**

891 **Table 1** Sampling information across all sites after filtering. Site information includes location  
892 and oil status at each site (exposure).

893

| Site Location     | Site Code | Exposure      | No. of individuals |
|-------------------|-----------|---------------|--------------------|
| Grand Isle, LA    | GIN1      | None          | 8                  |
| Grand Isle, LA    | GIN2      | None          | 6                  |
| Barataria Bay, LA | GIO1      | Heavily Oiled | 3                  |
| Barataria Bay, LA | GIO2      | Heavily Oiled | 7                  |
| Bay St. Louis, MS | MSN       | None          | 6                  |
| Bay St. Louis, MS | MSO       | Heavily Oiled | 8                  |

894  
895  
896 **Table 2** Association between oil exposure, genetic distance, and methylation distance across  
897 tests. Test statistics and significance determined through RDA. \*\*\* indicates significance at  $P \leq$   
898 0.001.

899

|                                  | df | F     |     | Variance Explained |
|----------------------------------|----|-------|-----|--------------------|
| Genetic                          | 1  | 2.183 | *** | 0.234              |
| Methylation                      |    |       |     |                    |
| Without control for genetic var. | 1  | 1.96  | *** | 0.167              |
| With control for genetic var.    | 1  | 1.199 |     | 0.099              |

900  
901  
902 **Table 3** Pairwise  $F_{st}$  among three oil contaminated and three uncontaminated sites. Bold (i.e. all  
903 entries) indicates significance at  $P < 0.001$ .

904

|      | GIN1          | GIN2          | MSN           | GIO1          | GIO2          |
|------|---------------|---------------|---------------|---------------|---------------|
| GIN2 | <b>0.0855</b> |               |               |               |               |
| MSN  | <b>0.1045</b> | <b>0.1219</b> |               |               |               |
| GIO1 | <b>0.0707</b> | <b>0.0909</b> | <b>0.1088</b> |               |               |
| GIO2 | <b>0.0885</b> | <b>0.1091</b> | <b>0.1251</b> | <b>0.0914</b> |               |
| MSO  | <b>0.1108</b> | <b>0.1343</b> | <b>0.1507</b> | <b>0.1106</b> | <b>0.1330</b> |

905

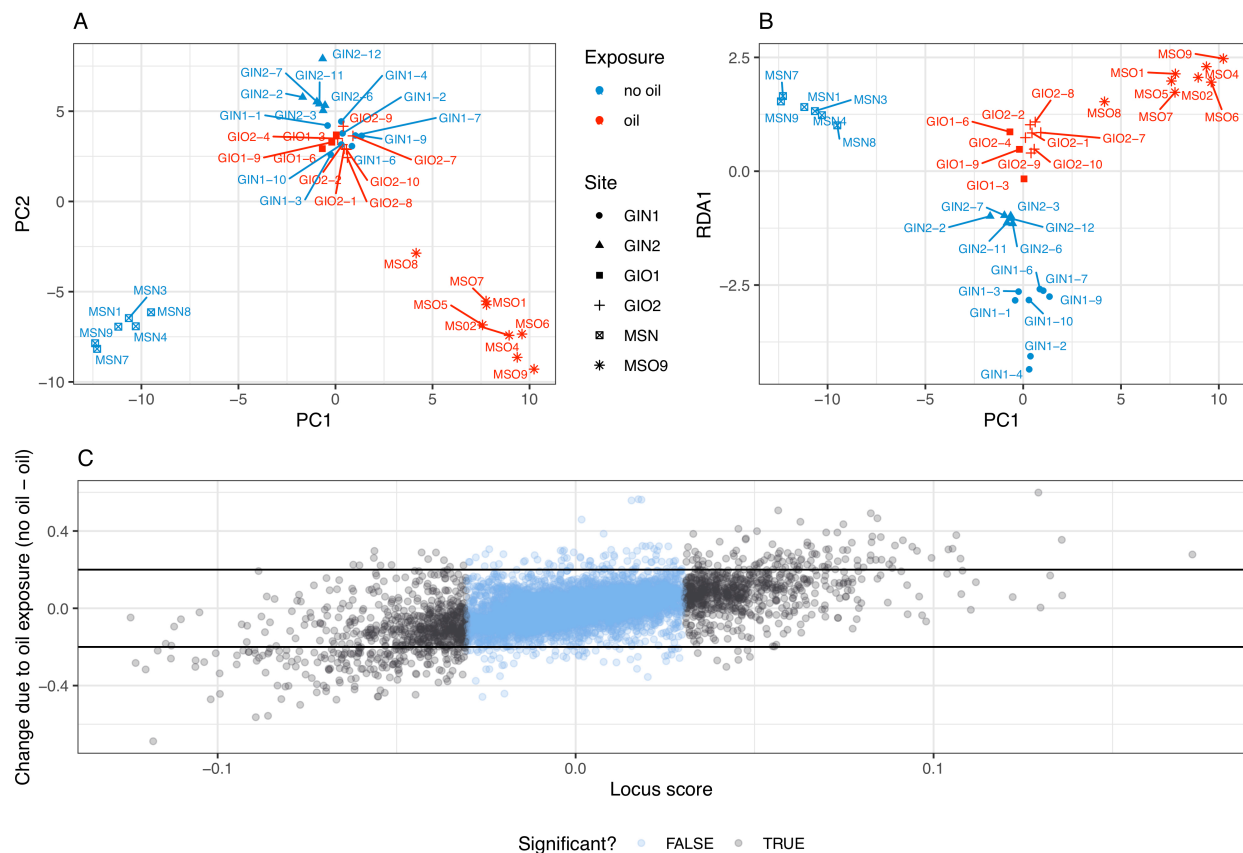

906  
 907 **Figure 1** A) Visualization of principal components 1 and 2 of allele frequency data (SNP) data.  
 908 B) Visualization of principal component 1 and RDA1, which represents the line of maximal  
 909 separation between samples based on allele frequency data. C) The locus score, representing  
 910 loadings of each SNP to the constrained axis, plotted against the average change in allele  
 911 frequency between unexposed and oil exposed populations. Significantly differentiated SNPs are  
 912 shown in black.  
 913



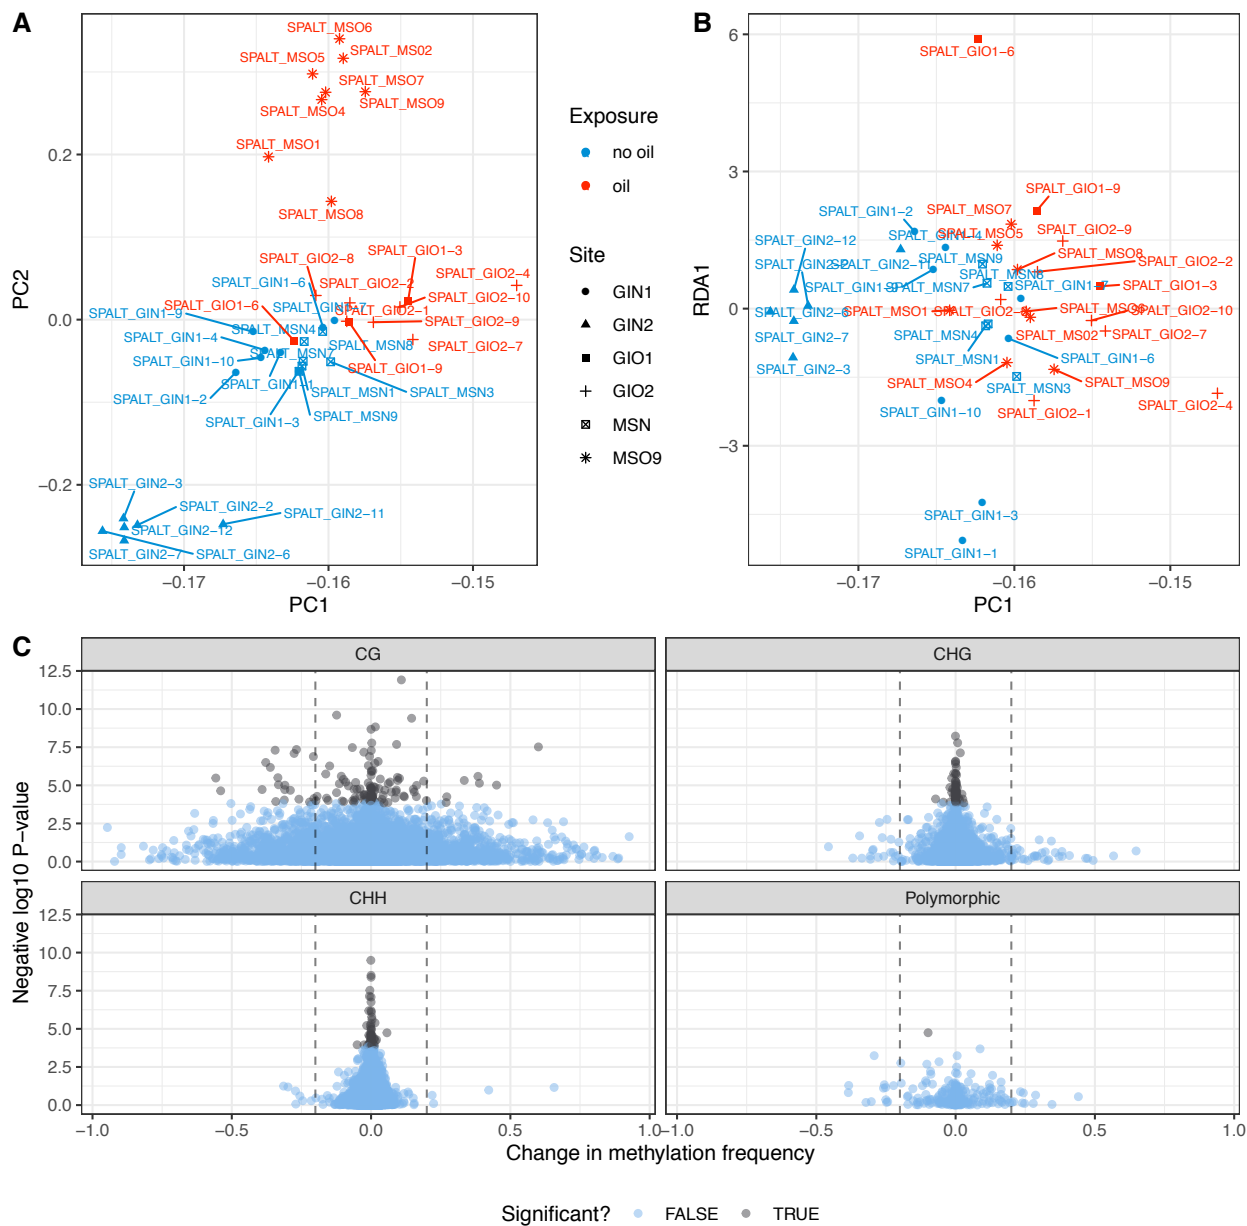

914  
 915 **Figure 2** A) Visualization of principal components 1 and 2 of methylation frequency data. B)  
 916 Visualization of principal component 1 and RDA1, which represents the line of maximal  
 917 separation between samples based on methylation frequency data, after controlling for genetic  
 918 variation and latent factors. C) All methylation polymorphisms, with differentially methylated  
 919 positions (DMPs) shown in black. Negative log<sub>10</sub> P-values are plotted on the Y axis while the  
 920 average change in methylation frequency between unexposed and oil exposed populations is  
 921 shown on the X axis. Dotted lines represent a change of at least 20%, either increased or  
 922 decreased, due to oil exposure.  
 923



924

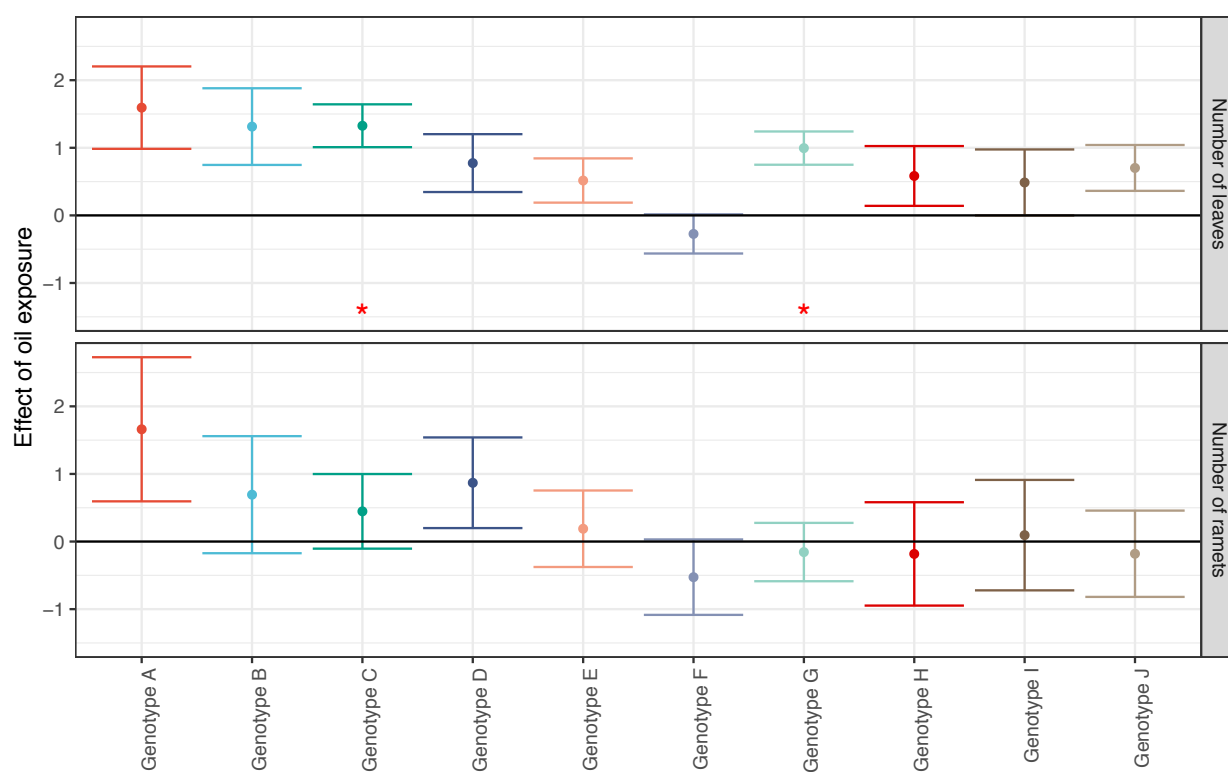

925

926 **Figure 3** Variation in effect size estimates of the effect of crude oil exposure in individual  
927 genotypes. Estimates were based on estimated marginal means in our greenhouse experiment.  
928 Asterisks represent significance in post-hoc comparisons.

929 **Author Contributions**

930 CLR & KJFV conceived the study. CLR, KJFV, MA, MR, MLA and AS designed the  
931 experiments and analyses. MA, MR, CAMW and TVG did the laboratory work. MA, MR, and  
932 TVG analyzed the epiGBS data. CLR, MA, DG, and AS analyzed the transcriptome and gene  
933 expression data. CLR, MA and MR wrote the first draft of the manuscript. All co-authors  
934 provided input and revisions to the manuscript.

935

936 **Data accessibility**

937 Raw data files are available on Dryad at XXX. Supplementary tables and figures can be  
938 found in the electronic supplementary material, and is available on  
939 [github.com/alvarezmf/DWH\\_epigbs](https://github.com/alvarezmf/DWH_epigbs) along with processed data and R scripts.

940

941 **Supporting Information**

942 Table S1 SNPs and methylation loci significantly associated with oil exposure.

943 Table S2 Post-hoc tests for the effect of crude oil exposure in individual genotypes. Estimates  
944 were based on estimated marginal means in our greenhouse experiment.

945 Figure S1 A) Principal components analysis on sampling depth per SNP allele. B) Percent  
946 variance explained by each principal component.

947 Figure S2 Upper half: percentage of present and imputed data per sample after filtering for A)  
948 SNP and B) methylation loci. Lower half: percentage of present and imputed data per locus after  
949 filtering for C) SNP and D) methylation loci. In C and D, only the first 5,000 loci are shown for  
950 clarity. Dotted lines represent missing data cut-off values for removal (80% missing for  
951 individuals in A & B, 50% for loci in C & D).
